# Supplementary material for: Evaluation of APACHE II score as predictor of outcome in patients with ruptured liver abscess: Prospective study in a tertiary care hospital
Source: Research Square preprint supplement (doi:10.21203/rs.3.rs-6355386/v1), 2025-05-08
Supplement: Supplementary file 1 [file 3e242ec00270ce168975e143.xlsx]

## Sheet: Sheet1
			Chief complaints					Co morbidities						Examination				Biochemical							1	2	3	4	4		ABG 5	ABG 6	7	8	9	10	11	12	apache 2 score	Xray chest	USG						Procedure
Age	Sex	Date of admission	Pain	Fever	Jaundice	Loose motions	obstipation	DM	Alcohol	smoking	HIV	CLD	T.B	Tenderness	Fever	Jaundice	Peritonitis	Hb	Platelet	PT/InR	Bil	ALP	Albumin		Fever	Respi Rate	Pulse	S.B.P	DBP	map	A-a gradient/PaO2	pH/HCO3	Na+	K+	Hb/HCT	TLC	Creat	GCS		Pleural effusion	Right lobe abscess	Left lobe abscess	Volume	Status	Number of abscess	Sub diaphragmatic	Pigtail	Surgical	icd
55	male	2023-02-23	1	no	no	no	no	no	no	no	no	no	yes	yes	no	no	no	10.8	4.46	1.36	0.3	109			no	16	86	110	110	110	97	7.43	134	3.8	33	11.6	0.5	15	7	yes	yes	no	960	2	1	2	yes	no	no
24	female	2023-02-23	10	no	no	no	no	no	no	no	no	no	no	yes	no	noo	no	9.9							no	16	84	134	76	95.3333	96	7.33	121	3.3	28	15.4	0.7	15	6	no	8	no	190	2	1	2	no	yes	no
23	male	2023-02-28	14	yes	yes	yes	no	no	no	no	no	no	no	yes	no	no	no	12.5	3.86	1.07	0.7	650			yes	16	68	116	84	94.6667	97	7.36	123	3.5	38	14.1	0.6	15	4	no	no	yes	0	2	1	4	no	no	no
34	male	2023-03-03	15	yes	no	no	no	no	no	no	no	no	no	yes	no	Ni	3	10.8	88	1.47	1.2				yes	15	90	122	80	94	98	7.38	127	4.5	34	21	0.3	15	6	yes	7	no	120	2	1	3	no	no	yes
55	male	2023-03-04	30	yes	no	no	no	no	yes	yes	no	no	no	yes	no	no	no	10.5	5.88		0.1	160	2		yes	16	76	110	70	83.3333	99	7.32	144	4.2	33.4	27.3	0.6	15	7	yes	12	no	200	2	1	6	no	yes	yes
28	male	2023-03-21	14	yes	yes	yes	no	no	yes	no	no	no	no	yes	yes	yes	1	13.7	3.85	1.47	0.6	214			yes	20	125	118	90	99.3333	102	7.34	135	4.4	42	11.8	0.4	15	4	yes	7	no	0	2	1	5	no	yes	no
70	male	2023-04-02	10	no	yes	no	no	no	no	no	no	no	no	yes	yes	yes	no	9.8	1.45	1.12	0.4	134			no	18	82	136	70	92	88	7.44	143	4.5	31.3	17.9	0.6	15	6	yes	no	yes	314	2	1	2	yes	no	no
46	male	2023-04-02	6	yes	yes	yes	no	no	yes	no	no	no	no	yes	yes	no	no	9.3	4.8	1.7	1.4	122	2.8		yes	16	102	115	72	86.3333	85	7.43	123	4.7	34.5	16.4	0.6	15	5	no	yes	no	300	2	1	3	yes	no	no
48	male	2023-04-09	30	yes	no	no	no	no	yes	no	no	no	no	yes	yes	no	3	9.9	3.27	1.64	0.6	206			yes	14	90	148	78	101.333	86	7.39	132	3.2	27.6	13.9	0.5	15	8	yes	12	no	150	2	2	2	yes	yes	no
48	female	2023-04-09	20	yes	no	no	no	no	no	no	no	no	no	yes	yes	no	3	10	4.54	2.01	0.7	334			yes	16	102	108	78	88	102	7.36	132	3.8	31	12.7	1	15	4	no	14	no	280	2	1	2	yes	no	no
38	male	2023-04-17	10	no	no	no	no	no	no	no	no	no	no	yes	no	no	no	9.7	2.22	1.35	0.6	237			no	16	96	108	74	85.3333	109	7.38	132	3.7	34	19.1	5.1	15	9	yes	7	no	120	2	1	6	no	no	yes
72	male	2023-04-21	7	yes	yes	no	no	no	no	no	no	no	yes	yes	yes	no	no	15	1.83	1.57	0.2	157	2.4		yes	15	84	128	72	90.6667	98	7.41	138	3.6	42	22.2	1	15	7	yes	6	no	0	2	1	2	no	yes	no
76	male	2023-04-26	15	yes	no	no	no	no	no	no	no	no	no	yes	no	no	1	10.4	1.11	2.06	1.9	407	2		yes	22	86	84	43	56.6667	74	7.32	126	6.1	37.7	27.2	5.7	15	26	yes	yes	no	0	2	1	6	no	no	yes
65	male	2023-05-08	3	no	no	no	no	yes	yes	yes	no	no	no	no	no	no	no	10.7	5.55	1.14	1	202			no	15	118	116	70	85.3333	98	7.39	146	4.3	38	18.4	0.9	15	10	yes	15	no	245	2	1	6	yes	no	no
42	male	2023-05-08	15	yes	no	no	no	no	no	no	no	no	no	yes	yes	no	no	11	1.73	1.36	1.7	569			yes	16	116	106	88	94	108	7.42	123	3.9	34	37	0.9	15	7	no	5	4	784	2	2	3	yes	no	no
32	male	2023-05-23	30	yes	no	no	no	no	no	no	no	no	no	yes	no	no	no	9	4.59	1.4	0.5	394			yes	16	94	124	82	96	97	7.44	131	3.9	31	8.5	0.5	15	3	no	15	no	650	2	1	0	yes	no	no
26	male	2023-05-25	15	yes	no	yes	no	no	yes	no	no	no	no	yes	yes	no	2	12.3	65	1.77	1	610	1.5		yes	18	102	108	75	86	70	7.4	124	3.8	30.3	24.7	2.5	15	11	no	no	no	no	2	2	4	no	yes	no
30	male	2023-05-26	8	yes	no	yes	no	no	yes	no	no	no	no	yes	no	no	no	10.6	2.53		1	157			yes	16	112	84	49	60.6667	98	7.39	131	4.4	34	29.4	1.1	15	7	no	13	no	30	2	1	3	yes	no	no
50	male	2023-05-27	25	no	no	no	no	no	yes	no	no	no	no	yes	no	no	no	9.9	3.48		0.6				no	17	112	99	68	78.3333	99	7.36	123	5.3	31	7.4	0.5	15	8	no	8	23	320	2	2	2	yes	no	no
26	male	2023-05-31	15	yes	no	yes	no	no	yes	yes	no	no	no	yes	no	yes	1	11.8	2.59	1.2	7	242			yes	14	90	114	64	80.6667	98	7.37	129	5.6	32	32.1	1	15	6	no	6	no	320	2	1	3	no	yes	no
73	female	2023-06-04	5	yes	no	no	no	yes	no	no	no	no	no	yes	no	no	no	6.9	1.01	1.05	1.9				yes	20	98	136	84	101.333	98	7.41	131	3.7	24	21.5	0.9	15	10	no	13	no	224	1	2	0	no	no	no
13	male	2023-06-08	3	yes	no	no	no	no	no	no	no	no	no	yes	no	no	3	9.1	3.16		1	290			yes	26	158	83	58	66.3333	99	7.38	128	5.2	27.7	37.7	1	15	9	no	15	no	260	2	1	3	no	yes	no
60	female	2023-06-11	7	yes	no	yes	no	no	no	no	no	no	no	yes	no	no	no	9.2	4.77	1.28	0.6	116			yes	16	90	152	74	100	97	7.43	133	3.2	31	9.5	0.7	15	5	no	7	no	100	2	1	3	no	no	no
43	male	2023-06-13	8	yes	no	no	no	no	no	no	no	no	no	yes	no	no	3	15.3	51	1.55	0.2				yes	16	86	129	79	95.6667	97	7.36	142	3.2	32	19.3	0.5	15	3	no	7	no	220	2	1	0	no	no	no
15	male	2023-06-15	5	yes	no	no	no	no	no	no	no	no	no	yes	no	no	3	13.5	2.21		0.4	102			yes	15	86	128	72	90.6667	96	7.42	133	3.5	30	42	0.8	15	5	no	yes	no	0	2	1	1	no	yes	no
50	male	2023-06-25	5	yes	no	no	no	no	no	no	no	no	no	yes	yes	no	3	13.5	2.21	1.23	0.8	102	2.2		yes	16	92	100	73	82	117	7.47	134	3.7	24	24.4	1.5	15	11	yes	8	2	282	2	1	1	yes	no	yes
72	male	2023-06-25	12	yes	no	no	no	no	no	no	no	yes	no	yes	no	no	2	8.4	3.24		0.7	262	1.9		yes	16	87	134	79	97.3333	102	7.43	128	4.7	27	20.2	0.6	15	12	yes	13	no	570	2	1	1	yes	no	no
50	male	2023-06-26	10	yes	no	no	no	no	no	no	no	no	no	no	no	no	no	8.1	3.7		1.7	620			yes	18	80	110	60	76.6667	117	7.44	131	4.4	31	17.2	1.2	15	4	no	5	yes	130	2	1	3	yes	no	no
65	male	2023-06-26	60	yes	no	no	no	yes	yes	no	no	yes	no	yes	no	yes	no	10.1	1.99		2	1427	2.7		yes	18	78	114	78	90	104	7.43	136	3.8	33	7.9	2.2	15	12	no	yes	no	0	1	2	2	yes	no	no
56	male	2023-06-26	5	yes	yes	no	no	no	no	no	no	no	no	yes	yes	no	3	10	30	1.45	1.8	220			yes	16	96	112	64	80	70	7.505	127	4.9	31	7.9	2.2	15	13	yes	6	no	no	2	2	4	yes	no	no
23	male	2023-06-28	5	yes	no	no	no	no	yes	yes	no	no	no	yes	no	no	3	10	30	1.45	1.8	220			yes	17	84	110	66	80.6667	97	7.43	127	4.5	29	14.5	0.7	15	5	yes	13	no	660	1	1	2	yes	no	no
39	male	2023-07-01	10	yes	no	no	no	no	no	no	no	no	no	yes	no	no	3	8.3	3.22	1.41	1	706			yes	20	124	100	66	77.3333	98	7.5	124	3.6	32	12.6	0.5	15	8	yes	86	no	400	1	2	2	yes	no	no
40	male	2023-07-04	10	yes	no	no	no	no	yes	yes	no	no	yes	yes	no	no	3	9.8	5.14	1.94	1	201			yes	18	88	100	68	78.6667	88	7.44	133	4.2	32	32.5	0.8	15	3	yes	no	23	360	2	1	0	no	yes	no
59	male	2023-07-10	2	yes	no	no	no	no	no	no	no	no	no	yes	no	no	no	11.1	5.59	1.32	0.6	168	1.6		no	16	92	134	96	108.667	93	7.412	137	3.8	35.9	17.2	0.7	15	4	no	20	no	180	2	2	2	yes	no	no
60	male	2023-07-13	4	no	no	no	no	no	no	no	no	no	no	yes	no	no	3	10.7	1.6	1.44	4.6	276	2.1		yes	14	99	101	62	75	98	7.37	125	3.8	34.3	12.7	1	15	6	yes	no	yes	420	2	1	1	yes	no	no
35	male	2023-07-15	7	yes	no	no	no	no	yes	yes	no	no	yes	yes	no	no	3	10.9	2.22	1.43	1.3	146			no	18	141	93	58	69.6667	86	7.48	130	3.7	32	13.7	1.5	15	8	yes	yes	no		2	1	0	no	yes	no
62	male	2023-07-22	7	yes	no	no	no	no	no	yes	no	no	yes	yes	yes	no	1	10	3.01		1.3	251			yes	14	100	118	72	87.3333	97	7.33	134	4.6	29	30.1	1.5	15	10	no	8	no	0	2	1	0	yes	no	no
70	male	2023-08-01	10	yes	yes	no	no	no	no	no	no	no	no	yes	yes	no	3	8.4	66	2.52	4.6	694			no	18	104	118	56	76.6667	88	7.14	135	3.7	33.5	26.2	1.8	15	13	yes	5	no	120	2	1	5	no	yes	no
42	male	2023-08-01	4	no	no	no	no	no	yes	no	no	no	no	yes	no	no	3	11.8	2.79	1.7	0.6	364			no	18	85	115	74	87.6667	92	7.07	117	4	21.2	50.4	1.8	15	17	no	58	no	400	2	2	2	no	yes	yes
55	male	2023-08-09	10	no	no	no	no	no	yes	no	no	no	no	yes	no	no	3	5.7	1.76	1.42	1.9	743			yes	20	108	152	110	124	72	7.228	121	5.3	44	39.6	1.7	15	19	yes	5	yes	130	2	2	2	no	yes	no
30	male	2023-08-10	30	yes	yes	yes	no	no	yes	no	no	yes	no	yes	yes	yes	1	14.6	1.01	1.7	0.9	238	2		yes	16	96	112	72	85.3333	105	7.2	130	3.1	29.3	32.1	0.9	15	9	no	no	2	350	2	1	5	no	no	no
44	male	2023-08-10	10	yes	no	no	no	no	no	no	no	no	no	yes	yes	no	no	8.7	2.06	1.04	0.7	168	1.2		yes	16	111	128	75	92.6667	94	7.38	127	5.1	33.4	24.2	1.6	15	9	no	15	no	250	1	2	2	yes	no	yes
50	male	2023-08-12	20	yes	no	no	no	no	yes	yes	no	no	no	yes	no	no	3	10.2	3.23		6.9	406			yes	20	112	88	72	77.3333	57	7.214	120	4.3	27.7	10.9	1.8	15	14	yes	no	yes	340	2	1	5	no	yes	no
55	male	2023-08-12	2	yes	no	yes	no	no	no	no	no	no	no	yes	no	no	no	10.5	1.62	1.68	4.3	566			yes	14	76	99	63	75	99	7.414	131	3.3	29.7	17.1	0.3	15	10	yes	11	no	50	2	1	3	no	no	no
13	male	2023-08-13	4	yes	no	no	no	no	yes	no	no	no	no	yes	no	no	3	10.7	1.75		1.1	90			yes	16	87	95	45	61.6667	102	7.44	118	4.3	31.6	15.1	0.4	15	11	yes	6	no	190	2	1	3	no	no	no
54	male	2023-08-13	5	yes	no	no	no	no	no	no	no	no	yes	yes	no	no	no	9.3	1.16		0.5	265	no		no	14	88	146	72	96.6667	101	7.389	133	4.5	42.6	10.5	0.8	15	4	no	13	no	390	2	1	3	no	no	yes
65	male	2023-08-19	10	no	no	no	no	no	no	no	no	no	no	no	no	no	no	15.3		1.1	0.5	143			yes	18	107	83	56	65	89	7.229	132	5.2	34.4	14	1.3	15	11	yes	18	no	300	2	2	1	no	yes	no
48	male	2023-08-20	5	yes	no	no	no	no	no	no	no	no	no	yes	no	no	1	12	75		2.8	207			yes	20	91	102	57	72	32.6	7.368	125	5.2	33	24.8	2.7	15	13	no	yes	no	1070	2	1	0	no	yes	no
40	male	2023-08-22	10	yes	yes	yes	no	no	no	no	no	no	no	yes	yes	yes	no	11.2	1.7	1.44	12.8	636			no	18	116	101	67	78.3333	92	7.33	132	4.3	35.3	11.7	0.7	15	2	yes	13	44	450	2	2	1	no	no	no
40	male	2023-08-22	2	no	no	no	no	no	no	no	no	no	no	yes	no	no	no	10.4	86	1.74	18.5	625	2.1		no	14	99	111	72	85	88	7.38	130	5.1	29.8	5.8	1.1	15	2	no	no	yes	630	2	1	0	yes	no	no
69	male	2023-08-24	30	no	no	no	no	no	no	no	no	no	no	yes	no	no	3	9.9	2.28	1.05	0.6	299			yes	18	100	110	66	80.6667	56.7	7.32	134	4.3	39.4	37.7	0.7	15	10	no	13	no	100	2	2	2	no	yes	no
70	female	2023-08-25	3	yes	yes	no	no	no	yes	no	no	no	no	yes	no	no	3	12.7	1.01	1.4	0.9	357	1.8		yes	16	100	110	66	80.6667	96	7.34	135	4.7	37	24.8	4.9	15	16	yes	no	yes	60	2	1	2	no	yes	no
13	female	2023-08-29	20	yes	yes	yes	no	no	no	no	no	yes	no	yes	no	no	3	11.7	2.21	1.4	0.6	154			yes	16	115	100	66	77.3333	89	7.36	132	4.5	31.3	9.1	0.3	15	5	yes	yes	no	650	2	1	3	yes	no	yes
38	male	2023-09-01	4	yes	no	no	no	no	no	no	no	no	no	yes	no	no	3	10.2	4.85		0.5	360			yes	16	152	183	71	108.333	92	7.36	136	4.4	35	14	0.8	15	4	yes	7	no	120	2	2	2	no	yes	no
55	male	2023-09-01	3	yes	no	no	yes	no	yes	yes	no	no	no	yes	no	no	1	12	7.55	1.71	1.3	165	2.3		yes	18	130	135	90	105	60	7.51	135	3.5	35.7	16.4	0.4	15	10	yes	13	no	0	2	1	2	no	yes	no
43	male	2023-09-06	10	yes	no	no	no	no	no	yes	no	no	no	yes	no	no	no	11.2	2.71	1.05	0.7	237			no	22	159	117	90	99	71.9	6.939	134	5.2	36.7	31	1.8	15	11	yes	7	no	140	2	1	2	no	yes	no
40	female	2023-09-10	6	no	yes	no	no	no	yes	no	no	no	no	yes	no	no	1	11.9	3.69	1.62	1	349			no	14	114	116	74	88	97	7.412	128	5.3	26.5	13.2	0.5	15	8	no	no	yes	0	2	1	2	yes	no	no
45	male	2023-09-11	7	no	no	no	no	no	no	no	no	no	no	yes	no	no	no	9.8	5.69	1.28	0.5	137			yes	18	130	90	60	70	112	7.35	127	3	32	17	0.7	15	9	no	5	no	161	2	1	2	no	no	no
30	male	2023-09-14	4	yes	yes	no	no	no	no	no	no	no	no	yes	yes	yes	no	11.2	32	1.56	6.5	491			no	20	90	118	72	87.3333	144	7.427	124	4.2	38.9	16.3	0.8	15	3	no	13	no	450	2	2	2	yes	no	no
32	male	2023-09-15	1	no	no	no	no	no	no	no	no	no	no	yes	no	no	no	11.8	1.76	1.3	0.9	373			yes	16	110	112	72	85.3333	102	7.47	131	3.4	33.9	23	0.9	15	6	no	8	no	140	2	1	2	yes	no	no
17	male	2023-09-23	10	yes	yes	no	no	no	no	no	no	no	no	yes	no	no	3	3.9	4.1	1.5	1.1	643			yes	16	104	142	120	127.333	102	7.336	127	4.9	22.4	10.6	0.7	15	7	yes	13	no	520	2	2	6	yes	no	no
46	male	2023-10-01	14	yes	no	no	no	no	no	no	no	no	no	yes	no	no	no	7.8	2.75	1.2	0.7	296			yes	18	92	160	80	106.667	110	7.445	136	4.5	37.9	21.5	0.7	15	5	no	13	no	180	2	2	2	yes	no	no
65	male	2023-10-13	20	yes	no	no	no	no	no	no	no	no	no	yes	yes	no	2	11.4		1.75	0.4	162	3.7		yes	16	107	120	78	92	156	7.224	139	5	25	19.3	0.4	15	13	no	yes	no	0	2	1	0	yes	no	no
46	male	2023-11-13	14	yes	no	no	no	no	no	yes	no	no	no	yes	no	no	no	7.7	1.55		10.2	68			no	14	107	108	88	94.6667	84	7.322	122	4.6	24.9	20	5	15	18	no	5	4	207	2	2	2	yes	no	no
35	female	2023-12-01	15	no	no	no	no	yes	yes	yes	no	no	yes	yes	no	no	2	12.2	4.29	1.95	1.3	511	1.8		yes	14	111	80	50	60	90	7.29	132	4	23.6	14.7	0.4	15	11	yes	yes	no	no	2	1	2	yes	no	yes
17	male	2023-08-12	5	yes	no	no	no	no	no	no	no	no	yes	no	no	no	no	7.2	4.45	1.8	3.4	141	1.9		no	14	108	112	72	85.3333	81	7.462	128	5.6	37	18	0.4	15	6	yes	no	yes	80	2	1	2	yes	no	no
51	male	2024-11-04	15	yes	yes	yes	no	no	yes	yes	no	no	no	yes	no	no	1	11	2.24	1.69	0.9	247			yes	24	130	95	73	80.3333	83	7.115	144	4.1	33	31	0.7	15	11	yes	15	no	400	2	1	5	yes	yes	no
35	male	27/03/24																							no	14	124	122	84	96.6667	98	7.422	138	4.5	29.4	12.2	0.6	15	4		14	no	900	2	1	1	yes	no	no
46	male	2023-12-08																							yes	18	105	106	70	82	68	7.312	131	3.8	34.8	38	1.9	15	9		15	no	600	2	1	3	no	yes	no
																	1= peritontis
																	2=local guarding																								caudate 1			unruptured-1	single, two - 1
																	3= tenderness																								seg 2 - 2			ruptured- 2	multiple - 2	perihepatic 1
																																									seg 3 -3					subcapsular 2
																																									seg 4 -4					subdiaphragmatic 3
																																									seg 5 -5					subheptic 4
																																									seg 6-6					peritoneal 5
																																									seg7-7					intra thoracic 6
																																									seg8-8
																																									6+7=13
																																									7+8=15
																																									4+5=9
																																									5+7=12
																																									seg 6 7 8 caudte 5= 27
																																									5+6=11
																																									6+7+8=21
																																									5+8=14
																																									7+8+5=20
																																									4+8=48
																																									6+7+5=18
																																									5+6+7+8=26
																																									8+6=86
																																									57+1=58
[truncated: 10 more columns]
