# Supplementary material for: Evaluation of APACHE II score as predictor of outcome in patients with ruptured liver abscess: Prospective study in a tertiary care hospital
Source: Research Square preprint supplement (doi:10.21203/rs.3.rs-6355386/v1), 2025-05-08
Supplement: Supplementary file 2 [file 7c8b41d8917346975f126ca3.xlsx]

## Sheet: Sheet1
Age	Sex	Date of admission	Pain	Fever	Jaundice	Loose motions	obstipation	DM	Alcohol	smoking	HIV	CLD	T.B	Tenderness	Fever	Jaundice	Peritonitis	Hb	Platelet	PT/InR	Bil	ALP	Albumin		Fever	Respi Rate	Pulse	map	A-a gradient/PaO2	pH/HCO3	Na+	K+	Hb/HCT	TLC	Creat	GCS		Pleural effusion	Right lobe abscess	Left lobe abscess	Volume	Status	Number of abscess	Sub diaphragmatic	Pigtail	Surgical	Procedure	antibiotic	Pus in ML
55	male	2023-02-23	1	no	no	no	no	no	no	no	no	no	yes	yes	no	no	no	10.8	4.46	1.36	0.3	109			no	16	86	110	97	7.43	134	3.8	33	11.6	0.5	15	7	yes	yes	no	960	2	1	2	yes	no	1	2
24	female	2023-02-23	10	no	no	no	no	no	no	no	no	no	no	yes	no	noo	no	9.9							no	16	84	95.3333	96	7.33	121	3.3	28	15.4	0.7	15	6	no	8	no	190	2	1	2	no	yes	2	2	600
23	male	2023-02-28	14	yes	yes	yes	no	no	no	no	no	no	no	yes	no	no	no	12.5	3.86	1.07	0.7	650			yes	16	68	94.6667	97	7.36	123	3.5	38	14.1	0.6	15	4	no	no	yes	0	2	1	4	no	no		1
34	male	2023-03-03	15	yes	no	no	no	no	no	no	no	no	no	yes	no	Ni	3	10.8	88	1.47	1.2				yes	15	90	94	98	7.38	127	4.5	34	21	0.3	15	6	yes	7	no	120	2	1	3	no	no		2
55	male	2023-03-04	30	yes	no	no	no	no	yes	yes	no	no	no	yes	no	no	no	10.5	5.88		0.1	160	2		yes	16	76	83.3333	99	7.32	144	4.2	33.4	27.3	0.6	15	7	yes	12	no	200	2	1	6	no	yes	2	2	800
28	male	2023-03-21	14	yes	yes	yes	no	no	yes	no	no	no	no	yes	yes	yes	1	13.7	3.85	1.47	0.6	214			yes	20	125	99.3333	102	7.34	135	4.4	42	11.8	0.4	15	4	yes	7	no	0	2	1	5	no	yes	2	2	1500
70	male	2023-04-02	10	no	yes	no	no	no	no	no	no	no	no	yes	yes	yes	no	9.8	1.45	1.12	0.4	134			no	18	82	92	88	7.44	143	4.5	31.3	17.9	0.6	15	6	yes	no	yes	314	2	1	2	yes	no	1	2
46	male	2023-04-02	6	yes	yes	yes	no	no	yes	no	no	no	no	yes	yes	no	no	9.3	4.8	1.7	1.4	122	2.8		yes	16	102	86.3333	85	7.43	123	4.7	34.5	16.4	0.6	15	5	no	yes	no	300	2	1	3	yes	no	1	2
48	male	2023-04-09	30	yes	no	no	no	no	yes	no	no	no	no	yes	yes	no	3	9.9	3.27	1.64	0.6	206			yes	14	90	101.333	86	7.39	132	3.2	27.6	13.9	0.5	15	8	yes	12	no	150	2	2	2	yes	yes	2	2	1000
48	female	2023-04-09	20	yes	no	no	no	no	no	no	no	no	no	yes	yes	no	3	10	4.54	2.01	0.7	334			yes	16	102	88	102	7.36	132	3.8	31	12.7	1	15	4	no	14	no	280	2	1	2	yes	no	1	2
38	male	2023-04-17	10	no	no	no	no	no	no	no	no	no	no	yes	no	no	no	9.7	2.22	1.35	0.6	237			no	16	96	85.3333	109	7.38	132	3.7	34	19.1	5.1	15	9	yes	7	no	120	2	1	6	no	no		2
72	male	2023-04-21	7	yes	yes	no	no	no	no	no	no	no	yes	yes	yes	no	no	15	1.83	1.57	0.2	157	2.4		yes	15	84	90.6667	98	7.41	138	3.6	42	22.2	1	15	7	yes	6	no	0	2	1	2	no	yes	2	2	150
76	male	2023-04-26	15	yes	no	no	no	no	no	no	no	no	no	yes	no	no	1	10.4	1.11	2.06	1.9	407	2		yes	22	86	56.6667	74	7.32	126	6.1	37.7	27.2	5.7	15	26	yes	yes	no	0	2	1	6	no	no		2
65	male	2023-05-08	3	no	no	no	no	yes	yes	yes	no	no	no	no	no	no	no	10.7	5.55	1.14	1	202			no	15	118	85.3333	98	7.39	146	4.3	38	18.4	0.9	15	10	yes	15	no	245	2	1	6	yes	no	1	2
42	male	2023-05-08	15	yes	no	no	no	no	no	no	no	no	no	yes	yes	no	no	11	1.73	1.36	1.7	569			yes	16	116	94	108	7.42	123	3.9	34	37	0.9	15	7	no	5	4	784	2	2	3	yes	no	1	2
32	male	2023-05-23	30	yes	no	no	no	no	no	no	no	no	no	yes	no	no	no	9	4.59	1.4	0.5	394			yes	16	94	96	97	7.44	131	3.9	31	8.5	0.5	15	3	no	15	no	650	2	1	0	yes	no	1	2
26	male	2023-05-25	15	yes	no	yes	no	no	yes	no	no	no	no	yes	yes	no	2	12.3	65	1.77	1	610	1.5		yes	18	102	86	70	7.4	124	3.8	30.3	24.7	2.5	15	11	no	no	no	no	2	2	4	no	yes	2	2	300
30	male	2023-05-26	8	yes	no	yes	no	no	yes	no	no	no	no	yes	no	no	no	10.6	2.53		1	157			yes	16	112	60.6667	98	7.39	131	4.4	34	29.4	1.1	15	7	no	13	no	30	2	1	3	yes	no	1	2
50	male	2023-05-27	25	no	no	no	no	no	yes	no	no	no	no	yes	no	no	no	9.9	3.48		0.6				no	17	112	78.3333	99	7.36	123	5.3	31	7.4	0.5	15	8	no	8	23	320	2	2	2	yes	no	1	2
26	male	2023-05-31	15	yes	no	yes	no	no	yes	yes	no	no	no	yes	no	yes	1	11.8	2.59	1.2	7	242			yes	14	90	80.6667	98	7.37	129	5.6	32	32.1	1	15	6	no	6	no	320	2	1	3	no	yes	2	2	1000
73	female	2023-06-04	5	yes	no	no	no	yes	no	no	no	no	no	yes	no	no	no	6.9	1.01	1.05	1.9				yes	20	98	101.333	98	7.41	131	3.7	24	21.5	0.9	15	10	no	13	no	224	1	2	0	no	no		1
13	male	2023-06-08	3	yes	no	no	no	no	no	no	no	no	no	yes	no	no	3	9.1	3.16		1	290			yes	26	158	66.3333	99	7.38	128	5.2	27.7	37.7	1	15	9	no	15	no	260	2	1	3	no	yes	2	2	200
60	female	2023-06-11	7	yes	no	yes	no	no	no	no	no	no	no	yes	no	no	no	9.2	4.77	1.28	0.6	116			yes	16	90	100	97	7.43	133	3.2	31	9.5	0.7	15	5	no	7	no	100	2	1	3	no	no		1
43	male	2023-06-13	8	yes	no	no	no	no	no	no	no	no	no	yes	no	no	3	15.3	51	1.55	0.2				yes	16	86	95.6667	97	7.36	142	3.2	32	19.3	0.5	15	3	no	7	no	220	2	1	0	no	no		1
15	male	2023-06-15	5	yes	no	no	no	no	no	no	no	no	no	yes	no	no	3	13.5	2.21		0.4	102			yes	15	86	90.6667	96	7.42	133	3.5	30	42	0.8	15	5	no	yes	no	0	2	1	1	no	yes	2	2	1000
50	male	2023-06-25	5	yes	no	no	no	no	no	no	no	no	no	yes	yes	no	3	13.5	2.21	1.23	0.8	102	2.2		yes	16	92	82	117	7.47	134	3.7	24	24.4	1.5	15	11	yes	8	2	282	2	1	1	yes	no	1	2
72	male	2023-06-25	12	yes	no	no	no	no	no	no	no	yes	no	yes	no	no	2	8.4	3.24		0.7	262	1.9		yes	16	87	97.3333	102	7.43	128	4.7	27	20.2	0.6	15	12	yes	13	no	570	2	1	1	yes	no	1	2
50	male	2023-06-26	10	yes	no	no	no	no	no	no	no	no	no	no	no	no	no	8.1	3.7		1.7	620			yes	18	80	76.6667	117	7.44	131	4.4	31	17.2	1.2	15	4	no	5	yes	130	2	1	3	yes	no	1	2
65	male	2023-06-26	60	yes	no	no	no	yes	yes	no	no	yes	no	yes	no	yes	no	10.1	1.99		2	1427	2.7		yes	18	78	90	104	7.43	136	3.8	33	7.9	2.2	15	12	no	yes	no	0	1	2	2	yes	no	1	2
56	male	2023-06-26	5	yes	yes	no	no	no	no	no	no	no	no	yes	yes	no	3	10	30	1.45	1.8	220			yes	16	96	80	70	7.505	127	4.9	31	7.9	2.2	15	13	yes	6	no	no	2	2	4	yes	no	1	2
23	male	2023-06-28	5	yes	no	no	no	no	yes	yes	no	no	no	yes	no	no	3	10	30	1.45	1.8	220			yes	17	84	80.6667	97	7.43	127	4.5	29	14.5	0.7	15	5	yes	13	no	660	1	1	2	yes	no	1	2
39	male	2023-07-01	10	yes	no	no	no	no	no	no	no	no	no	yes	no	no	3	8.3	3.22	1.41	1	706			yes	20	124	77.3333	98	7.5	124	3.6	32	12.6	0.5	15	8	yes	86	no	400	1	2	2	yes	no	1	2
40	male	2023-07-04	10	yes	no	no	no	no	yes	yes	no	no	yes	yes	no	no	3	9.8	5.14	1.94	1	201			yes	18	88	78.6667	88	7.44	133	4.2	32	32.5	0.8	15	3	yes	no	23	360	2	1	0	no	yes	2	2	2000
59	male	2023-07-10	2	yes	no	no	no	no	no	no	no	no	no	yes	no	no	no	11.1	5.59	1.32	0.6	168	1.6		no	16	92	108.667	93	7.412	137	3.8	35.9	17.2	0.7	15	4	no	20	no	180	2	2	2	yes	no	1	2
60	male	2023-07-13	4	no	no	no	no	no	no	no	no	no	no	yes	no	no	3	10.7	1.6	1.44	4.6	276	2.1		yes	14	99	75	98	7.37	125	3.8	34.3	12.7	1	15	6	yes	no	yes	420	2	1	1	yes	no	1	2
35	male	2023-07-15	7	yes	no	no	no	no	yes	yes	no	no	yes	yes	no	no	3	10.9	2.22	1.43	1.3	146			no	18	141	69.6667	86	7.48	130	3.7	32	13.7	1.5	15	8	yes	yes	no		2	1	0	no	yes	2	2	300
62	male	2023-07-22	7	yes	no	no	no	no	no	yes	no	no	yes	yes	yes	no	1	10	3.01		1.3	251			yes	14	100	87.3333	97	7.33	134	4.6	29	30.1	1.5	15	10	no	8	no	0	2	1	0	yes	no	1	2
70	male	2023-08-01	10	yes	yes	no	no	no	no	no	no	no	no	yes	yes	no	3	8.4	66	2.52	4.6	694			no	18	104	76.6667	88	7.14	135	3.7	33.5	26.2	1.8	15	13	yes	5	no	120	2	1	5	no	yes	2	2	1000
42	male	2023-08-01	4	no	no	no	no	no	yes	no	no	no	no	yes	no	no	3	11.8	2.79	1.7	0.6	364			no	18	85	87.6667	92	7.07	117	4	21.2	50.4	1.8	15	17	no	58	no	400	2	2	2	no	yes	2	2	1000
55	male	2023-08-09	10	no	no	no	no	no	yes	no	no	no	no	yes	no	no	3	5.7	1.76	1.42	1.9	743			yes	20	108	124	72	7.228	121	5.3	44	39.6	1.7	15	19	yes	5	yes	130	2	2	2	no	yes	2	2	2000
30	male	2023-08-10	30	yes	yes	yes	no	no	yes	no	no	yes	no	yes	yes	yes	1	14.6	1.01	1.7	0.9	238	2		yes	16	96	85.3333	105	7.2	130	3.1	29.3	32.1	0.9	15	9	no	no	2	350	2	1	5	no	no		1
44	male	2023-08-10	10	yes	no	no	no	no	no	no	no	no	no	yes	yes	no	no	8.7	2.06	1.04	0.7	168	1.2		yes	16	111	92.6667	94	7.38	127	5.1	33.4	24.2	1.6	15	9	no	15	no	250	1	2	2	yes	no	1	2
50	male	2023-08-12	20	yes	no	no	no	no	yes	yes	no	no	no	yes	no	no	3	10.2	3.23		6.9	406			yes	20	112	77.3333	57	7.214	120	4.3	27.7	10.9	1.8	15	14	yes	no	yes	340	2	1	5	no	yes	2	2	2000
55	male	2023-08-12	2	yes	no	yes	no	no	no	no	no	no	no	yes	no	no	no	10.5	1.62	1.68	4.3	566			yes	14	76	75	99	7.414	131	3.3	29.7	17.1	0.3	15	10	yes	11	no	50	2	1	3	no	no		1
13	male	2023-08-13	4	yes	no	no	no	no	yes	no	no	no	no	yes	no	no	3	10.7	1.75		1.1	90			yes	16	87	61.6667	102	7.44	118	4.3	31.6	15.1	0.4	15	11	yes	6	no	190	2	1	3	no	no		1
54	male	2023-08-13	5	yes	no	no	no	no	no	no	no	no	yes	yes	no	no	no	9.3	1.16		0.5	265	no		no	14	88	96.6667	101	7.389	133	4.5	42.6	10.5	0.8	15	4	no	13	no	390	2	1	3	no	no		2
65	male	2023-08-19	10	no	no	no	no	no	no	no	no	no	no	no	no	no	no	15.3		1.1	0.5	143			yes	18	107	65	89	7.229	132	5.2	34.4	14	1.3	15	11	yes	18	no	300	2	2	1	no	yes	2	2	500
48	male	2023-08-20	5	yes	no	no	no	no	no	no	no	no	no	yes	no	no	1	12	75		2.8	207			yes	20	91	72	32.6	7.368	125	5.2	33	24.8	2.7	15	13	no	yes	no	1070	2	1	0	no	yes	2	2	800
40	male	2023-08-22	10	yes	yes	yes	no	no	no	no	no	no	no	yes	yes	yes	no	11.2	1.7	1.44	12.8	636			no	18	116	78.3333	92	7.33	132	4.3	35.3	11.7	0.7	15	2	yes	13	44	450	2	2	1	no	no		1
40	male	2023-08-22	2	no	no	no	no	no	no	no	no	no	no	yes	no	no	no	10.4	86	1.74	18.5	625	2.1		no	14	99	85	88	7.38	130	5.1	29.8	5.8	1.1	15	2	no	no	yes	630	2	1	0	yes	no	1	2
69	male	2023-08-24	30	no	no	no	no	no	no	no	no	no	no	yes	no	no	3	9.9	2.28	1.05	0.6	299			yes	18	100	80.6667	56.7	7.32	134	4.3	39.4	37.7	0.7	15	10	no	13	no	100	2	2	2	no	yes	2	2	1500
70	female	2023-08-25	3	yes	yes	no	no	no	yes	no	no	no	no	yes	no	no	3	12.7	1.01	1.4	0.9	357	1.8		yes	16	100	80.6667	96	7.34	135	4.7	37	24.8	4.9	15	16	yes	no	yes	60	2	1	2	no	yes	2	2	2000
13	female	2023-08-29	20	yes	yes	yes	no	no	no	no	no	yes	no	yes	no	no	3	11.7	2.21	1.4	0.6	154			yes	16	115	77.3333	89	7.36	132	4.5	31.3	9.1	0.3	15	5	yes	yes	no	650	2	1	3	yes	no	1	2
38	male	2023-09-01	4	yes	no	no	no	no	no	no	no	no	no	yes	no	no	3	10.2	4.85		0.5	360			yes	16	152	108.333	92	7.36	136	4.4	35	14	0.8	15	4	yes	7	no	120	2	2	2	no	yes	2	2	1000
55	male	2023-09-01	3	yes	no	no	yes	no	yes	yes	no	no	no	yes	no	no	1	12	7.55	1.71	1.3	165	2.3		yes	18	130	105	60	7.51	135	3.5	35.7	16.4	0.4	15	10	yes	13	no	0	2	1	2	no	yes	2	2	400
43	male	2023-09-06	10	yes	no	no	no	no	no	yes	no	no	no	yes	no	no	no	11.2	2.71	1.05	0.7	237			no	22	159	99	71.9	6.939	134	5.2	36.7	31	1.8	15	11	yes	7	no	140	2	1	2	no	yes	2	2	500
40	female	2023-09-10	6	no	yes	no	no	no	yes	no	no	no	no	yes	no	no	1	11.9	3.69	1.62	1	349			no	14	114	88	97	7.412	128	5.3	26.5	13.2	0.5	15	8	no	no	yes	0	2	1	2	yes	no	1	2
45	male	2023-09-11	7	no	no	no	no	no	no	no	no	no	no	yes	no	no	no	9.8	5.69	1.28	0.5	137			yes	18	130	70	112	7.35	127	3	32	17	0.7	15	9	no	5	no	161	2	1	2	no	no		1
30	male	2023-09-14	4	yes	yes	no	no	no	no	no	no	no	no	yes	yes	yes	no	11.2	32	1.56	6.5	491			no	20	90	87.3333	144	7.427	124	4.2	38.9	16.3	0.8	15	3	no	13	no	450	2	2	2	yes	no	1	2
32	male	2023-09-15	1	no	no	no	no	no	no	no	no	no	no	yes	no	no	no	11.8	1.76	1.3	0.9	373			yes	16	110	85.3333	102	7.47	131	3.4	33.9	23	0.9	15	6	no	8	no	140	2	1	2	yes	no	1	2
17	male	2023-09-23	10	yes	yes	no	no	no	no	no	no	no	no	yes	no	no	3	3.9	4.1	1.5	1.1	643			yes	16	104	127.333	102	7.336	127	4.9	22.4	10.6	0.7	15	7	yes	13	no	520	2	2	6	yes	no	1	2
46	male	2023-10-01	14	yes	no	no	no	no	no	no	no	no	no	yes	no	no	no	7.8	2.75	1.2	0.7	296			yes	18	92	106.667	110	7.445	136	4.5	37.9	21.5	0.7	15	5	no	13	no	180	2	2	2	yes	no	1	2
65	male	2023-10-13	20	yes	no	no	no	no	no	no	no	no	no	yes	yes	no	2	11.4		1.75	0.4	162	3.7		yes	16	107	92	156	7.224	139	5	25	19.3	0.4	15	13	no	yes	no	0	2	1	0	yes	no	1	2
46	male	2023-11-13	14	yes	no	no	no	no	no	yes	no	no	no	yes	no	no	no	7.7	1.55		10.2	68			no	14	107	94.6667	84	7.322	122	4.6	24.9	20	5	15	18	no	5	4	207	2	2	2	yes	no	1	2
35	female	2023-12-01	15	no	no	no	no	yes	yes	yes	no	no	yes	yes	no	no	2	12.2	4.29	1.95	1.3	511	1.8		yes	14	111	60	90	7.29	132	4	23.6	14.7	0.4	15	11	yes	yes	no	no	2	1	2	yes	no	1	2
17	male	2023-08-12	5	yes	no	no	no	no	no	no	no	no	yes	no	no	no	no	7.2	4.45	1.8	3.4	141	1.9		no	14	108	85.3333	81	7.462	128	5.6	37	18	0.4	15	6	yes	no	yes	80	2	1	2	yes	no	1	2
51	male	2024-11-04	15	yes	yes	yes	no	no	yes	yes	no	no	no	yes	no	no	1	11	2.24	1.69	0.9	247			yes	24	130	80.3333	83	7.115	144	4.1	33	31	0.7	15	11	yes	15	no	400	2	1	5	yes	yes	2	2	1000
35	male	27/03/24	7	yes	no	no	no	no	no	no	no	no	no	yes	no	no	no	10	1.65	1.77	0.8	336	2.8		no	14	124	96.6667	98	7.422	138	4.5	29.4	12.2	0.6	15	4	no	14	no	900	2	1	1	yes	no	1	2
46	male	2023-12-08	8	yes	no	yes	no	no	no	no	no	no	no	yes	no	no	1	8.4	2.22	1.89	2.3	246	2.4		yes	18	105	82	68	7.312	131	3.8	34.8	38	1.9	15	9	yes	15	no	600	2	1	3	no	yes	2	2	400
																	1- peritonitis																						caudate 1			unruptured - 1	1- single	perihepatic 1				1- only antibiotic
																	2- local guarding																						seg 2 - 2				2- multiple	subcapsular 2
																	3- tenderness																						seg 3 -3			ruptured -2		subdiaphragmatic 3
																																							seg 4 -4					subheptic 4
																																							seg 5 -5					peritoneal 5
																																							seg 6-6					intra thoracic 6
																																							seg7-7
																																							seg8-8
																																							segments multiple
																																							6+7=13
																																							7+8=15
																																							4+5=9
																																							5+7=12
																																							seg 6 7 8 caudte 5= 27
																																							5+6=11
																																							6+7+8=21
																																							5+8=14
																																							7+8+5=20
																																							4+8=48
																																							6+7+5=18
																																							5+6+7+8=26
																																							8+6=86
																																							57+1=58
[truncated: 9 more columns]

## Sheet: Sheet2
Frequency Table
Sex
		Frequency	Percent	Valid Percent	Cumulative Percent
Valid	female	8	11.5942	11.5942	11.5942
	male	61	88.4058	88.4058	100
	Total	69	100	100
Fever
		Frequency	Percent	Valid Percent	Cumulative Percent
Valid	no	16	23.1884	23.1884	23.1884
	yes	53	76.8116	76.8116	100
	Total	69	100	100
Jaundice
		Frequency	Percent	Valid Percent	Cumulative Percent
Valid	no	54	78.2609	78.2609	78.2609
	yes	15	21.7391	21.7391	100
	Total	69	100	100
Loose motions
		Frequency	Percent	Valid Percent	Cumulative Percent
Valid	no	56	81.1594	81.1594	81.1594
	yes	13	18.8406	18.8406	100
	Total	69	100	100
obstipation
		Frequency	Percent	Valid Percent	Cumulative Percent
Valid	no	68	98.5507	98.5507	98.5507
	yes	1	1.44928	1.44928	100
	Total	69	100	100
DM
		Frequency	Percent	Valid Percent	Cumulative Percent
Valid	no	65	94.2029	94.2029	94.2029
	yes	4	5.7971	5.7971	100
	Total	69	100	100
Alcohol
		Frequency	Percent	Valid Percent	Cumulative Percent
Valid	no	46	66.6667	66.6667	66.6667
	yes	23	33.3333	33.3333	100
	Total	69	100	100
smoking
		Frequency	Percent	Valid Percent	Cumulative Percent
Valid	no	56	81.1594	81.1594	81.1594
	yes	13	18.8406	18.8406	100
	Total	69	100	100
HIV
		Frequency	Percent	Valid Percent	Cumulative Percent
Valid	no	69	100	100	100
CLD
		Frequency	Percent	Valid Percent	Cumulative Percent
Valid	no	65	94.2029	94.2029	94.2029
	yes	4	5.7971	5.7971	100
	Total	69	100	100
T.B
		Frequency	Percent	Valid Percent	Cumulative Percent
Valid	no	61	88.4058	88.4058	88.4058
	yes	8	11.5942	11.5942	100
	Total	69	100	100
Tenderness
		Frequency	Percent	Valid Percent	Cumulative Percent
Valid	no	4	5.7971	5.7971	5.7971
	yes	65	94.2029	94.2029	100
	Total	69	100	100
Fever
		Frequency	Percent	Valid Percent	Cumulative Percent
Valid	no	52	75.3623	75.3623	75.3623
	yes	17	24.6377	24.6377	100
	Total	69	100	100
Jaundice
		Frequency	Percent	Valid Percent	Cumulative Percent
Valid	no	62	89.8551	89.8551	89.8551
	yes	7	10.1449	10.1449	100
	Total	69	100	100
Peritonitis
		Frequency	Percent	Valid Percent	Cumulative Percent
Valid	1	10	14.4928	14.4928	14.4928
	2	4	5.7971	5.7971	20.2899
	3	23	33.3333	33.3333	53.6232
	no	32	46.3768	46.3768	100
	Total	69	100	100
Fever
		Frequency	Percent	Valid Percent	Cumulative Percent
Valid	no	19	27.5362	27.5362	27.5362
	yes	50	72.4638	72.4638	100
	Total	69	100	100
Status
		Frequency	Percent	Valid Percent	Cumulative Percent
Valid	1	5	7.24638	7.24638	7.24638
	2	64	92.7536	92.7536	100
	Total	69	100	100
Number of abscess
		Frequency	Percent	Valid Percent	Cumulative Percent
Valid	1	49	71.0145	71.0145	71.0145
	2	20	28.9855	28.9855	100
	Total	69	100	100
Sub diaphragmatic
		Frequency	Percent	Valid Percent	Cumulative Percent
Valid	0	9	13.0435	13.0435	13.0435
	1	7	10.1449	10.1449	23.1884
	2	27	39.1304	39.1304	62.3188
	3	13	18.8406	18.8406	81.1594
	4	3	4.34783	4.34783	85.5072
	5	5	7.24638	7.24638	92.7536
	6	5	7.24638	7.24638	100
	Total	69	100	100
Pigtail
		Frequency	Percent	Valid Percent	Cumulative Percent
Valid	no	35	50.7246	50.7246	50.7246
	yes	34	49.2754	49.2754	100
	Total	69	100	100
Surgical
		Frequency	Percent	Valid Percent	Cumulative Percent
Valid	no	45	65.2174	65.2174	65.2174
	yes	24	34.7826	34.7826	100
	Total	69	100	100
Procedure
		Frequency	Percent	Valid Percent	Cumulative Percent
Valid	1.00	32	46.3768	57.1429	57.1429
	2.00	24	34.7826	42.8571	100
	Total	56	81.1594	100
Missing	System	13	18.8406
Total		69	100
antibiotic
		Frequency	Percent	Valid Percent	Cumulative Percent
Valid	1	9	13.0435	13.0435	13.0435
	2	60	86.9565	86.9565	100
	Total	69	100	100
colon perforation
		Frequency	Percent	Valid Percent	Cumulative Percent
Valid	no	59	85.5072	85.5072	85.5072
	yes	10	14.4928	14.4928	100
	Total	69	100	100
Pleura rupture
		Frequency	Percent	Valid Percent	Cumulative Percent
Valid	no	68	98.5507	98.5507	98.5507
	yes	1	1.44928	1.44928	100
	Total	69	100	100
Pleural effusion
		Frequency	Percent	Valid Percent	Cumulative Percent
Valid	no	34	49.2754	49.2754	49.2754
	yes	35	50.7246	50.7246	100
	Total	69	100	100
Statistics
		Age	Pain	Hb	Platelet	PT/InR	Bil	ALP	Albumin	Respi Rate	Pulse	map	A-a gradient/PaO2	pH/HCO3	Na+	K+	Hb/HCT	TLC	Creat	GCS	Right lobe abscess	Left lobe abscess	Volume	Pus in ML
N	Valid	69	69	69	66	53	68	64	20	69	69	69	69	69	69	69	69	69	69	69	69	69	65	24
	Missing	0	0	0	3	16	1	5	49	0	0	0	0	0	0	0	0	0	0	0	0	0	4	45
Mean		44.9565	11.2464	10.4826	10.5438	1.5	1.98382	323.875	2.16	16.8986	102.348	86.9469	93.5826	7.3637	130.638	4.25942	32.342	20.2783	1.2	15			279.492	956.25
Median		46	10	10.4	3.19	1.45	1	246.5	2.05	16	100	86	97	7.38	131	4.3	32	17.9	0.8	15			220	1000
Mode		55	10	10	1.01a	1.05a	0.6	102a	2	16	90	85.3333	98	7.360a	131a	3.8a	31.0a	7.9a	0.7	15			0	1000
Std. Deviation		16.5888	9.61678	2.06333	20.7855	0.30322	3.05705	229.827	0.55098	2.44435	18.9239	13.7944	17.6075	0.10171	6.21897	0.694584	4.78405	9.62523	1.13746	0			249.684	599.15
Minimum		13	1	3.9	1.01	1.04	0.1	68	1.2	14	68	56.6667	32.6	6.939	117	3	21.2	5.8	0.3	15			0	150
Maximum		76	60	15.3	88	2.52	18.5	1427	3.7	26	159	127.333	156	7.51	146	6.1	44	50.4	5.7	15			1070	2000
Percentiles	25	33	5	9.5	1.95	1.29	0.6	160.5	1.825	16	88	78.3333	88	7.33	127	3.7	29.55	12.95	0.6	15			110	425
	50	46	10	10.4	3.19	1.45	1	246.5	2.05	16	100	86	97	7.38	131	4.3	32	17.9	0.8	15			220	1000
	75	55.5	15	11.75	4.8125	1.7	1.8	403	2.4	18	112	95.5	100	7.43	134	4.7	34.9	25.5	1.5	15			400	1375
a. Multiple modes exist. The smallest value is shown
Sex * Procedure
Crosstab
			Procedure		Total
			1.00	2.00
Sex	female	Count	4	2	6
		% within Sex	0.666667	0.333333	1
		% within Procedure	0.125	0.0833333	0.107143
	male	Count	28	22	50
		% within Sex	0.56	0.44	1
		% within Procedure	0.875	0.916667	0.892857
Total		Count	32	24	56
		% within Sex	0.571429	0.428571	1
		% within Procedure	1	1	1
Chi-Square Tests
	Value	df	Asymptotic Significance (2-sided)	Exact Sig. (2-sided)	Exact Sig. (1-sided)
Pearson Chi-Square	.249a	1	0.617859
Continuity Correctionb	0.00388889	1	0.950275
Likelihood Ratio	0.254558	1	0.613884
Fisher's Exact Test				0.690806	0.482443
N of Valid Cases	56
a. 2 cells (50.0%) have expected count less than 5. The minimum expected count is 2.57.
b. Computed only for a 2x2 table
Fever * Procedure
Crosstab
			Procedure		Total
			1.00	2.00
Fever	no	Count	9	5	14
		% within Fever	0.642857	0.357143	1
		% within Procedure	0.28125	0.208333	0.25
	yes	Count	23	19	42
		% within Fever	0.547619	0.452381	1
		% within Procedure	0.71875	0.791667	0.75
Total		Count	32	24	56
		% within Fever	0.571429	0.428571	1
		% within Procedure	1	1	1
Chi-Square Tests
	Value	df	Asymptotic Significance (2-sided)	Exact Sig. (2-sided)	Exact Sig. (1-sided)
Pearson Chi-Square	.389a	1	0.532884
Continuity Correctionb	0.0972222	1	0.755189
Likelihood Ratio	0.393691	1	0.530365
Fisher's Exact Test				0.756109	0.380718
N of Valid Cases	56
a. 0 cells (.0%) have expected count less than 5. The minimum expected count is 6.00.
b. Computed only for a 2x2 table
Jaundice * Procedure
Crosstab
			Procedure		Total
			1.00	2.00
Jaundice	no	Count	25	19	44
		% within Jaundice	0.568182	0.431818	1
		% within Procedure	0.78125	0.791667	0.785714
	yes	Count	7	5	12
		% within Jaundice	0.583333	0.416667	1
		% within Procedure	0.21875	0.208333	0.214286
Total		Count	32	24	56
		% within Jaundice	0.571429	0.428571	1
		% within Procedure	1	1	1
Chi-Square Tests
	Value	df	Asymptotic Significance (2-sided)	Exact Sig. (2-sided)	Exact Sig. (1-sided)
Pearson Chi-Square	.009a	1	0.925099
Continuity Correctionb	0	1	1
Likelihood Ratio	0.00885401	1	0.925033
Fisher's Exact Test				1	0.595878
N of Valid Cases	56
a. 0 cells (.0%) have expected count less than 5. The minimum expected count is 5.14.
b. Computed only for a 2x2 table
Loose motions * Procedure
Crosstab
			Procedure		Total
			1.00	2.00
Loose motions	no	Count	29	19	48
		% within Loose motions	0.604167	0.395833	1
		% within Procedure	0.90625	0.791667	0.857143
	yes	Count	3	5	8
		% within Loose motions	0.375	0.625	1
		% within Procedure	0.09375	0.208333	0.142857
Total		Count	32	24	56
		% within Loose motions	0.571429	0.428571	1
		% within Procedure	1	1	1
Chi-Square Tests
	Value	df	Asymptotic Significance (2-sided)	Exact Sig. (2-sided)	Exact Sig. (1-sided)
Pearson Chi-Square	1.470a	1	0.225269
Continuity Correctionb	0.683594	1	0.408352
Likelihood Ratio	1.45724	1	0.22737
Fisher's Exact Test				0.267998	0.203725
N of Valid Cases	56
a. 2 cells (50.0%) have expected count less than 5. The minimum expected count is 3.43.
b. Computed only for a 2x2 table
obstipation * Procedure
Crosstab
			Procedure		Total
			1.00	2.00
obstipation	no	Count	32	23	55
		% within obstipation	0.581818	0.418182	1
		% within Procedure	1	0.958333	0.982143
	yes	Count	0	1	1
		% within obstipation	0	1	1
		% within Procedure	0	0.0416667	0.0178571
Total		Count	32	24	56
		% within obstipation	0.571429	0.428571	1
		% within Procedure	1	1	1
Chi-Square Tests
	Value	df	Asymptotic Significance (2-sided)	Exact Sig. (2-sided)	Exact Sig. (1-sided)
Pearson Chi-Square	1.358a	1	0.243958
Continuity Correctionb	0.0212121	1	0.884203
Likelihood Ratio	1.71889	1	0.189836
Fisher's Exact Test				0.428571	0.428571
N of Valid Cases	56
a. 2 cells (50.0%) have expected count less than 5. The minimum expected count is .43.
b. Computed only for a 2x2 table
DM * Procedure
Crosstab
			Procedure		Total
			1.00	2.00
DM	no	Count	29	24	53
		% within DM	0.54717	0.45283	1
		% within Procedure	0.90625	1	0.946429
	yes	Count	3	0	3
		% within DM	1	0	1
		% within Procedure	0.09375	0	0.0535714
Total		Count	32	24	56
		% within DM	0.571429	0.428571	1
		% within Procedure	1	1	1
Chi-Square Tests
	Value	df	Asymptotic Significance (2-sided)	Exact Sig. (2-sided)	Exact Sig. (1-sided)
Pearson Chi-Square	2.377a	1	0.123106
Continuity Correctionb	0.887841	1	0.346063
Likelihood Ratio	3.48451	1	0.0619458
Fisher's Exact Test				0.251948	0.178932
N of Valid Cases	56
a. 2 cells (50.0%) have expected count less than 5. The minimum expected count is 1.29.
b. Computed only for a 2x2 table
Alcohol * Procedure
Crosstab
			Procedure		Total
			1.00	2.00
Alcohol	no	Count	24	11	35
		% within Alcohol	0.685714	0.314286	1
		% within Procedure	0.75	0.458333	0.625
	yes	Count	8	13	21
		% within Alcohol	0.380952	0.619048	1
		% within Procedure	0.25	0.541667	0.375
Total		Count	32	24	56
		% within Alcohol	0.571429	0.428571	1
		% within Procedure	1	1	1
Chi-Square Tests
	Value	df	Asymptotic Significance (2-sided)	Exact Sig. (2-sided)	Exact Sig. (1-sided)
Pearson Chi-Square	4.978a	1	0.0256749
Continuity Correctionb	3.81111	1	0.0509137
Likelihood Ratio	5.00143	1	0.0253264
Fisher's Exact Test				0.0496136	0.0253961
N of Valid Cases	56
a. 0 cells (.0%) have expected count less than 5. The minimum expected count is 9.00.
b. Computed only for a 2x2 table
smoking * Procedure
Crosstab
			Procedure		Total
			1.00	2.00
smoking	no	Count	27	16	43
		% within smoking	0.627907	0.372093	1
		% within Procedure	0.84375	0.666667	0.767857
	yes	Count	5	8	13
		% within smoking	0.384615	0.615385	1
		% within Procedure	0.15625	0.333333	0.232143
Total		Count	32	24	56
		% within smoking	0.571429	0.428571	1
		% within Procedure	1	1	1
Chi-Square Tests
	Value	df	Asymptotic Significance (2-sided)	Exact Sig. (2-sided)	Exact Sig. (1-sided)
Pearson Chi-Square	2.413a	1	0.120359
Continuity Correctionb	1.52147	1	0.217398
Likelihood Ratio	2.39729	1	0.121546
Fisher's Exact Test				0.200077	0.109094
N of Valid Cases	56
a. 0 cells (.0%) have expected count less than 5. The minimum expected count is 5.57.
b. Computed only for a 2x2 table
HIV * Procedure
Crosstab
			Procedure		Total
			1.00	2.00
HIV	no	Count	32	24	56
		% within HIV	0.571429	0.428571	1
		% within Procedure	1	1	1
Total		Count	32	24	56
		% within HIV	0.571429	0.428571	1
		% within Procedure	1	1	1
Chi-Square Tests
	Value
Pearson Chi-Square	.a
N of Valid Cases	56
a. No statistics are computed because HIV is a constant.
CLD * Procedure
Crosstab
			Procedure		Total
			1.00	2.00
CLD	no	Count	29	24	53
		% within CLD	0.54717	0.45283	1
		% within Procedure	0.90625	1	0.946429
	yes	Count	3	0	3
		% within CLD	1	0	1
		% within Procedure	0.09375	0	0.0535714
Total		Count	32	24	56
		% within CLD	0.571429	0.428571	1
		% within Procedure	1	1	1
Chi-Square Tests
	Value	df	Asymptotic Significance (2-sided)	Exact Sig. (2-sided)	Exact Sig. (1-sided)
Pearson Chi-Square	2.377a	1	0.123106
Continuity Correctionb	0.887841	1	0.346063
Likelihood Ratio	3.48451	1	0.0619458
Fisher's Exact Test				0.251948	0.178932
N of Valid Cases	56
a. 2 cells (50.0%) have expected count less than 5. The minimum expected count is 1.29.
b. Computed only for a 2x2 table
T.B * Procedure
Crosstab
			Procedure		Total
			1.00	2.00
T.B	no	Count	28	21	49
		% within T.B	0.571429	0.428571	1
		% within Procedure	0.875	0.875	0.875
	yes	Count	4	3	7
		% within T.B	0.571429	0.428571	1
		% within Procedure	0.125	0.125	0.125
Total		Count	32	24	56
		% within T.B	0.571429	0.428571	1
		% within Procedure	1	1	1
Chi-Square Tests
	Value	df	Asymptotic Significance (2-sided)	Exact Sig. (2-sided)	Exact Sig. (1-sided)
Pearson Chi-Square	.000a	1	1
Continuity Correctionb	0	1	1
Likelihood Ratio	0	1	1
Fisher's Exact Test				1	0.661776
N of Valid Cases	56
a. 2 cells (50.0%) have expected count less than 5. The minimum expected count is 3.00.
b. Computed only for a 2x2 table
Tenderness * Procedure
Crosstab
			Procedure		Total
			1.00	2.00
Tenderness	no	Count	3	1	4
		% within Tenderness	0.75	0.25	1
		% within Procedure	0.09375	0.0416667	0.0714286
	yes	Count	29	23	52
		% within Tenderness	0.557692	0.442308	1
		% within Procedure	0.90625	0.958333	0.928571
Total		Count	32	24	56
		% within Tenderness	0.571429	0.428571	1
		% within Procedure	1	1	1
Chi-Square Tests
	Value	df	Asymptotic Significance (2-sided)	Exact Sig. (2-sided)	Exact Sig. (1-sided)
Pearson Chi-Square	.561a	1	0.453899
Continuity Correctionb	0.0504808	1	0.822229
Likelihood Ratio	0.593572	1	0.441041
Fisher's Exact Test				0.627281	0.42201
N of Valid Cases	56
a. 2 cells (50.0%) have expected count less than 5. The minimum expected count is 1.71.
b. Computed only for a 2x2 table
Fever * Procedure
Crosstab
			Procedure		Total
			1.00	2.00
Fever	no	Count	22	19	41
		% within Fever	0.536585	0.463415	1
		% within Procedure	0.6875	0.791667	0.732143
	yes	Count	10	5	15
		% within Fever	0.666667	0.333333	1
		% within Procedure	0.3125	0.208333	0.267857
Total		Count	32	24	56
		% within Fever	0.571429	0.428571	1
		% within Procedure	1	1	1
Chi-Square Tests
	Value	df	Asymptotic Significance (2-sided)	Exact Sig. (2-sided)	Exact Sig. (1-sided)
Pearson Chi-Square	.759a	1	0.383702
Continuity Correctionb	0.320596	1	0.57125
Likelihood Ratio	0.771922	1	0.379623
Fisher's Exact Test				0.543742	0.287807
N of Valid Cases	56
a. 0 cells (.0%) have expected count less than 5. The minimum expected count is 6.43.
b. Computed only for a 2x2 table
Jaundice * Procedure
Crosstab
			Procedure		Total
			1.00	2.00
Jaundice	no	Count	29	22	51
		% within Jaundice	0.568627	0.431373	1
		% within Procedure	0.90625	0.916667	0.910714
	yes	Count	3	2	5
		% within Jaundice	0.6	0.4	1
		% within Procedure	0.09375	0.0833333	0.0892857
Total		Count	32	24	56
		% within Jaundice	0.571429	0.428571	1
		% within Procedure	1	1	1
Chi-Square Tests
	Value	df	Asymptotic Significance (2-sided)	Exact Sig. (2-sided)	Exact Sig. (1-sided)
Pearson Chi-Square	.018a	1	0.892391
Continuity Correctionb	0	1	1
Likelihood Ratio	0.0184026	1	0.892093
Fisher's Exact Test				1	0.63704
N of Valid Cases	56
a. 2 cells (50.0%) have expected count less than 5. The minimum expected count is 2.14.
b. Computed only for a 2x2 table
Peritonitis * Procedure
Crosstab
			Procedure		Total
			1.00	2.00
Peritonitis	1	Count	2	6	8
		% within Peritonitis	0.25	0.75	1
		% within Procedure	0.0625	0.25	0.142857
	2	Count	3	1	4
		% within Peritonitis	0.75	0.25	1
		% within Procedure	0.09375	0.0416667	0.0714286
	3	Count	8	12	20
		% within Peritonitis	0.4	0.6	1
		% within Procedure	0.25	0.5	0.357143
	no	Count	19	5	24
		% within Peritonitis	0.791667	0.208333	1
		% within Procedure	0.59375	0.208333	0.428571
Total		Count	32	24	56
		% within Peritonitis	0.571429	0.428571	1
		% within Procedure	1	1	1
Chi-Square Tests
	Value	df	Asymptotic Significance (2-sided)
Pearson Chi-Square	11.049a	3	0.0114622
Likelihood Ratio	11.5057	3	0.0092834
N of Valid Cases	56
a. 4 cells (50.0%) have expected count less than 5. The minimum expected count is 1.71.
Fever * Procedure
Crosstab
			Procedure		Total
			1.00	2.00
Fever	no	Count	11	5	16
		% within Fever	0.6875	0.3125	1
		% within Procedure	0.34375	0.208333	0.285714
	yes	Count	21	19	40
		% within Fever	0.525	0.475	1
		% within Procedure	0.65625	0.791667	0.714286
Total		Count	32	24	56
		% within Fever	0.571429	0.428571	1
		% within Procedure	1	1	1
Chi-Square Tests
	Value	df	Asymptotic Significance (2-sided)	Exact Sig. (2-sided)	Exact Sig. (1-sided)
Pearson Chi-Square	1.232a	1	0.266962
Continuity Correctionb	0.658073	1	0.417241
Likelihood Ratio	1.25921	1	0.2618
Fisher's Exact Test				0.37269	0.209626
N of Valid Cases	56
a. 0 cells (.0%) have expected count less than 5. The minimum expected count is 6.86.
b. Computed only for a 2x2 table
Pleural effusion * Procedure
Crosstab
			Procedure		Total
			1.00	2.00
Pleural effusion	no	Count	19	8	27
		% within Pleural effusion	0.703704	0.296296	1
		% within Procedure	0.59375	0.333333	0.482143
	yes	Count	13	16	29
		% within Pleural effusion	0.448276	0.551724	1
		% within Procedure	0.40625	0.666667	0.517857
Total		Count	32	24	56
		% within Pleural effusion	0.571429	0.428571	1
		% within Procedure	1	1	1
Chi-Square Tests
	Value	df	Asymptotic Significance (2-sided)	Exact Sig. (2-sided)	Exact Sig. (1-sided)
Pearson Chi-Square	3.725a	1	0.053604
Continuity Correctionb	2.755	1	0.0969507
Likelihood Ratio	3.77863	1	0.0519112
Fisher's Exact Test				0.0643934	0.0479434
N of Valid Cases	56
a. 0 cells (.0%) have expected count less than 5. The minimum expected count is 11.57.
b. Computed only for a 2x2 table
Status * Procedure
Crosstab
			Procedure		Total
			1.00	2.00
Status	1	Count	4	0	4
		% within Status	1	0	1
		% within Procedure	0.125	0	0.0714286
	2	Count	28	24	52
		% within Status	0.538462	0.461538	1
		% within Procedure	0.875	1	0.928571
Total		Count	32	24	56
		% within Status	0.571429	0.428571	1
		% within Procedure	1	1	1
Chi-Square Tests
	Value	df	Asymptotic Significance (2-sided)	Exact Sig. (2-sided)	Exact Sig. (1-sided)
Pearson Chi-Square	3.231a	1	0.0722667
Continuity Correctionb	1.62099	1	0.202953
Likelihood Ratio	4.7064	1	0.0300506
Fisher's Exact Test				0.126837	0.0979063
Linear-by-Linear Association	3.17308	1	0.0748613
N of Valid Cases	56
a. 2 cells (50.0%) have expected count less than 5. The minimum expected count is 1.71.
b. Computed only for a 2x2 table
Number of abscess * Procedure
Crosstab
			Procedure		Total
			1.00	2.00
Number of abscess	1	Count	21	17	38
		% within Number of abscess	0.552632	0.447368	1
		% within Procedure	0.65625	0.708333	0.678571
	2	Count	11	7	18
		% within Number of abscess	0.611111	0.388889	1
		% within Procedure	0.34375	0.291667	0.321429
Total		Count	32	24	56
		% within Number of abscess	0.571429	0.428571	1
		% within Procedure	1	1	1
Chi-Square Tests
	Value	df	Asymptotic Significance (2-sided)	Exact Sig. (2-sided)	Exact Sig. (1-sided)
Pearson Chi-Square	.171a	1	0.67961
Continuity Correctionb	0.0153509	1	0.901396
Likelihood Ratio	0.17141	1	0.678861
Fisher's Exact Test				0.77654	0.452818
Linear-by-Linear Association	0.167519	1	0.682326
N of Valid Cases	56
a. 0 cells (.0%) have expected count less than 5. The minimum expected count is 7.71.
b. Computed only for a 2x2 table
Sub diaphragmatic * Procedure
Crosstab
			Procedure		Total
			1.00	2.00
Sub diaphragmatic	0	Count	4	3	7
		% within Sub diaphragmatic	0.571429	0.428571	1
		% within Procedure	0.125	0.125	0.125
	1	Count	4	2	6
		% within Sub diaphragmatic	0.666667	0.333333	1
		% within Procedure	0.125	0.0833333	0.107143
	2	Count	16	10	26
		% within Sub diaphragmatic	0.615385	0.384615	1
		% within Procedure	0.5	0.416667	0.464286
	3	Count	5	3	8
		% within Sub diaphragmatic	0.625	0.375	1
		% within Procedure	0.15625	0.125	0.142857
	4	Count	1	1	2
		% within Sub diaphragmatic	0.5	0.5	1
		% within Procedure	0.03125	0.0416667	0.0357143
	5	Count	0	4	4
		% within Sub diaphragmatic	0	1	1
		% within Procedure	0	0.166667	0.0714286
	6	Count	2	1	3
		% within Sub diaphragmatic	0.666667	0.333333	1
		% within Procedure	0.0625	0.0416667	0.0535714
Total		Count	32	24	56
		% within Sub diaphragmatic	0.571429	0.428571	1
		% within Procedure	1	1	1
Chi-Square Tests
	Value	df	Asymptotic Significance (2-sided)
Pearson Chi-Square	6.007a	6	0.422383
Likelihood Ratio	7.46366	6	0.280086
Linear-by-Linear Association	1.16923	1	0.279559
N of Valid Cases	56
a. 12 cells (85.7%) have expected count less than 5. The minimum expected count is .86.
colon perforation * Procedure
Crosstab
			Procedure		Total
			1.00	2.00
colon perforation	no	Count	32	14	46
		% within colon perforation	0.695652	0.304348	1
		% within Procedure	1	0.583333	0.821429
	yes	Count	0	10	10
		% within colon perforation	0	1	1
		% within Procedure	0	0.416667	0.178571
Total		Count	32	24	56
		% within colon perforation	0.571429	0.428571	1
		% within Procedure	1	1	1
Chi-Square Tests
	Value	df	Asymptotic Significance (2-sided)	Exact Sig. (2-sided)	Exact Sig. (1-sided)
Pearson Chi-Square	16.232a	1	5.60429e-05
Continuity Correctionb	13.5156	1	0.000236591
Likelihood Ratio	19.9514	1	7.94357e-06
Fisher's Exact Test				5.50806e-05	5.50806e-05
N of Valid Cases	56
a. 1 cells (25.0%) have expected count less than 5. The minimum expected count is 4.29.
b. Computed only for a 2x2 table
Pleura rupture * Procedure
Crosstab
			Procedure		Total
			1.00	2.00
Pleura rupture	no	Count	32	23	55
		% within Pleura rupture	0.581818	0.418182	1
		% within Procedure	1	0.958333	0.982143
	yes	Count	0	1	1
		% within Pleura rupture	0	1	1
		% within Procedure	0	0.0416667	0.0178571
Total		Count	32	24	56
		% within Pleura rupture	0.571429	0.428571	1
		% within Procedure	1	1	1
Chi-Square Tests
	Value	df	Asymptotic Significance (2-sided)	Exact Sig. (2-sided)	Exact Sig. (1-sided)
Pearson Chi-Square	1.358a	1	0.243958
Continuity Correctionb	0.0212121	1	0.884203
Likelihood Ratio	1.71889	1	0.189836
Fisher's Exact Test				0.428571	0.428571
N of Valid Cases	56
a. 2 cells (50.0%) have expected count less than 5. The minimum expected count is .43.
b. Computed only for a 2x2 table
Group Statistics
Procedure		N	Mean	Std. Deviation	Std. Error Mean
Age	1.00	32	44.8125	15.7919	2.79163
	2.00	24	45.1667	17.3172	3.53485
Pain	1.00	32	11.4375	11.3732	2.01053
	2.00	24	11.5833	8.39729	1.71409
Hb	1.00	32	9.9125	1.81228	0.320369
	2.00	24	11.05	2.16393	0.441711
Platelet	1.00	31	8.52258	16.6204	2.98512
	2.00	22	12.1268	23.1068	4.92638
PT/InR	1.00	25	1.4808	0.257487	0.0514973
	2.00	17	1.56176	0.37216	0.090262
Bil	1.00	32	2.1875	3.5954	0.635584
	2.00	23	1.63913	1.9465	0.405873
ALP	1.00	31	341.613	271.776	48.8124
	2.00	23	295.478	173.596	36.1972
Albumin	1.00	12	2.23333	0.669237	0.193192
	2.00	6	2.06667	0.36697	0.149815
Respi Rate	1.00	32	16.0312	1.63597	0.289202
	2.00	24	18.1667	2.92911	0.597903
Pulse	1.00	32	101.5	12.7911	2.26117
	2.00	24	108.625	24.7647	5.05506
map	1.00	32	88.25	13.3277	2.35602
	2.00	24	86.6944	14.2259	2.90385
A-a gradient/PaO2	1.00	32	100	16.3115	2.88349
	2.00	24	82.3417	17.6446	3.6017
pH/HCO3	1.00	32	7.40334	0.0602129	0.0106442
	2.00	24	7.30938	0.135747	0.0277092
Na+	1.00	32	130.719	5.94184	1.05038
	2.00	24	131.083	6.97771	1.42432
K+	1.00	32	4.40937	0.563606	0.0996323
	2.00	24	4.26667	0.705054	0.143919
Hb/HCT	1.00	32	31.1875	4.33134	0.76568
	2.00	24	33.4333	5.25404	1.07248
TLC	1.00	32	16.6219	7.1982	1.27247
	2.00	24	26.3375	11.0757	2.26082
Creat	1.00	32	1.00312	0.874176	0.154534
	2.00	24	1.37917	0.991696	0.202429
GCS	1.00	32	15	.000a	0
	2.00	24	15	.000a	0
Volume	1.00	30	351.067	274.391	50.0966
	2.00	22	239.091	243.973	52.0153
Pus in ML	1.00	0b
	2.00	24	956.25	599.15	122.301
a. t cannot be computed because the standard deviations of both groups are 0.
b. t cannot be computed because at least one of the groups is empty.
Independent Samples Test
		Levene's Test for Equality of Variances		t-test for Equality of Means
		F	Sig.	t	df	Significance		Mean Difference	Std. Error Difference	95% Confidence Interval of the Difference
						One-Sided p	Two-Sided p			Lower	Upper
Age	Equal variances assumed	0.222164	0.639295	-0.0796885	54	0.46839	0.93678	-0.354167	4.44439	-9.26463	8.5563
	Equal variances not assumed			-0.0786292	47.0561	0.46883	0.937661	-0.354167	4.50426	-9.41529	8.70696
Pain	Equal variances assumed	0.303937	0.583699	-0.0528835	54	0.47901	0.95802	-0.145833	2.75763	-5.67456	5.38289
	Equal variances not assumed			-0.0551975	53.9945	0.478092	0.956185	-0.145833	2.64203	-5.44279	5.15113
Hb	Equal variances assumed	0.964677	0.330392	-2.13859	54	0.0185047	0.0370093	-1.1375	0.531893	-2.20388	-0.0711192
	Equal variances not assumed			-2.08463	44.4389	0.0214404	0.0428808	-1.1375	0.54566	-2.2369	-0.0381013
Platelet	Equal variances assumed	2.13037	0.150538	-0.661211	51	0.255727	0.511453	-3.60424	5.45096	-14.5475	7.33903
	Equal variances not assumed			-0.625711	35.8674	0.267733	0.535466	-3.60424	5.76023	-15.288	8.07954
PT/InR	Equal variances assumed	1.49016	0.229339	-0.834816	40	0.20439	0.40878	-0.0809647	0.0969851	-0.276979	0.115049
	Equal variances not assumed			-0.779112	26.2568	0.22144	0.44288	-0.0809647	0.103919	-0.294472	0.132543
Bil	Equal variances assumed	0.975094	0.3279	0.663752	53	0.254863	0.509726	0.54837	0.826166	-1.10871	2.20545
	Equal variances not assumed			0.727163	49.7747	0.235266	0.470532	0.54837	0.754122	-0.966498	2.06324
ALP	Equal variances assumed	1.94826	0.168706	0.712471	52	0.239679	0.479358	46.1346	64.753	-83.8017	176.071
	Equal variances not assumed			0.759179	51.0255	0.225619	0.451239	46.1346	60.7692	-75.863	168.132
Albumin	Equal variances assumed	1.4816	0.241174	0.563436	16	0.290475	0.580949	0.166667	0.295804	-0.46041	0.793743
	Equal variances not assumed			0.681735	15.7095	0.252667	0.505334	0.166667	0.244474	-0.352376	0.685709
Respi Rate	Equal variances assumed	4.94154	0.0304253	-3.47099	54	0.00051392	0.00102784	-2.13542	0.615219	-3.36886	-0.901977
	Equal variances not assumed			-3.21515	33.6544	0.00143796	0.00287592	-2.13542	0.664173	-3.48569	-0.785144
Pulse	Equal variances assumed	10.1517	0.00239664	-1.40014	54	0.0835957	0.167191	-7.125	5.08878	-17.3274	3.0774
	Equal variances not assumed			-1.28663	32.1692	0.103704	0.207407	-7.125	5.53774	-18.4027	4.15268
map	Equal variances assumed	0.54266	0.464521	0.419951	54	0.338094	0.676187	1.55556	3.70413	-5.87079	8.9819
	Equal variances not assumed			0.41599	47.8603	0.339639	0.679277	1.55556	3.73941	-5.9636	9.07471
A-a gradient/PaO2	Equal variances assumed	1.61393	0.209386	3.87125	54	0.000147122	0.000294243	17.6583	4.56141	8.51326	26.8034
	Equal variances not assumed			3.82732	47.4651	0.000189207	0.000378414	17.6583	4.61375	8.37906	26.9376
pH/HCO3	Equal variances assumed	10.7312	0.00184349	3.49217	54	0.000481823	0.000963646	0.0939688	0.0269084	0.0400207	0.147917
	Equal variances not assumed			3.16571	29.8072	0.00177649	0.00355299	0.0939688	0.0296833	0.0333309	0.154607
Na+	Equal variances assumed	0.483012	0.490041	-0.210844	54	0.416901	0.833802	-0.364583	1.72916	-3.83134	3.10217
	Equal variances not assumed			-0.20601	44.9547	0.418857	0.837714	-0.364583	1.76974	-3.92912	3.19995
K+	Equal variances assumed	1.42513	0.237779	0.841864	54	0.201789	0.403577	0.142708	0.169515	-0.197148	0.482565
	Equal variances not assumed			0.815288	43.0007	0.2097	0.419401	0.142708	0.17504	-0.210294	0.495711
Hb/HCT	Equal variances assumed	0.463097	0.499088	-1.75229	54	0.0427	0.0853999	-2.24583	1.28165	-4.81539	0.323726
	Equal variances not assumed			-1.70429	43.9502	0.0476939	0.0953877	-2.24583	1.31775	-4.90167	0.410006
TLC	Equal variances assumed	6.64004	0.0127368	-3.97344	54	0.000105805	0.00021161	-9.71562	2.44514	-14.6178	-4.81341
	Equal variances not assumed			-3.74496	37.1167	0.000305517	0.000611034	-9.71562	2.59432	-14.9717	-4.4596
Creat	Equal variances assumed	1.1075	0.297313	-1.50378	54	0.0692317	0.138463	-0.376042	0.250064	-0.877389	0.125306
	Equal variances not assumed			-1.47657	46.0224	0.0733009	0.146602	-0.376042	0.254673	-0.888665	0.136581
Volume	Equal variances assumed	1.41365	0.240068	1.52236	50	0.0671095	0.134219	111.976	73.5541	-35.762	259.713
	Equal variances not assumed			1.55055	48.0743	0.0637841	0.127568	111.976	72.2168	-33.22	257.172
Independent Samples Effect Sizes
		Standardizera	Point Estimate	95% Confidence Interval
				Lower	Upper
Age	Cohen's d	16.4588	-0.0215184	-0.550685	0.507847
	Hedges' correction	16.6919	-0.0212179	-0.542995	0.500755
	Glass's delta	17.3172	-0.0204518	-0.549514	0.509053
Pain	Cohen's d	10.2123	-0.0142802	-0.543472	0.515043
	Hedges' correction	10.3569	-0.0140808	-0.535882	0.507851
	Glass's delta	8.39729	-0.0173667	-0.546453	0.512095
Hb	Cohen's d	1.96975	-0.577485	-1.11521	-0.0346317
	Hedges' correction	1.99764	-0.569421	-1.09964	-0.034148
	Glass's delta	2.16393	-0.525663	-1.07079	0.0299881
Platelet	Cohen's d	19.5536	-0.184326	-0.730971	0.364115
	Hedges' correction	19.8472	-0.181599	-0.72016	0.358729
	Glass's delta	23.1068	-0.155982	-0.702536	0.394237
PT/InR	Cohen's d	0.308514	-0.262435	-0.879613	0.357986
	Hedges' correction	0.314453	-0.257478	-0.862999	0.351225
	Glass's delta	0.37216	-0.217554	-0.83489	0.406427
Bil	Cohen's d	3.02221	0.181446	-0.356296	0.717488
	Hedges' correction	3.06584	0.178865	-0.351226	0.707279
	Glass's delta	1.9465	0.281721	-0.263527	0.82075
ALP	Cohen's d	235.292	0.196074	-0.345557	0.735833
	Hedges' correction	238.755	0.19323	-0.340545	0.72516
	Glass's delta	173.596	0.265759	-0.28219	0.807824
Albumin	Cohen's d	0.591608	0.281718	-0.707359	1.26215
	Hedges' correction	0.621271	0.268267	-0.673585	1.20189
	Glass's delta	0.36697	0.45417	-0.583649	1.45136
Respi Rate	Cohen's d	2.27833	-0.937274	-1.49122	-0.3755
	Hedges' correction	2.31059	-0.924185	-1.47039	-0.370256
	Glass's delta	2.92911	-0.729032	-1.2914	-0.152985
Pulse	Cohen's d	18.8452	-0.378081	-0.910374	0.157646
	Hedges' correction	19.1121	-0.372801	-0.897662	0.155445
	Glass's delta	24.7647	-0.287708	-0.820341	0.250999
map	Cohen's d	13.7174	0.1134	-0.416804	0.642557
	Hedges' correction	13.9117	0.111816	-0.410983	0.633585
	Glass's delta	14.2259	0.109347	-0.422014	0.638352
A-a gradient/PaO2	Cohen's d	16.8922	1.04536	0.476472	1.60571
	Hedges' correction	17.1314	1.03076	0.469818	1.58328
	Glass's delta	17.6446	1.00078	0.39003	1.5947
pH/HCO3	Cohen's d	0.0996493	0.942995	0.380861	1.49726
	Hedges' correction	0.101061	0.929826	0.375542	1.47635
	Glass's delta	0.135747	0.692235	0.120255	1.25106
Na+	Cohen's d	6.40356	-0.0569345	-0.586031	0.472688
	Hedges' correction	6.49425	-0.0561394	-0.577847	0.466087
	Glass's delta	6.97771	-0.0522497	-0.581149	0.477778
K+	Cohen's d	0.627761	0.227329	-0.304691	0.757262
	Hedges' correction	0.636651	0.224155	-0.300436	0.746688
	Glass's delta	0.705054	0.202408	-0.332192	0.732683
Hb/HCT	Cohen's d	4.74632	-0.473174	-1.00773	0.0656412
	Hedges' correction	4.81354	-0.466566	-0.99366	0.0647246
	Glass's delta	5.25404	-0.427449	-0.966378	0.12026
TLC	Cohen's d	9.05505	-1.07295	-1.63505	-0.502152
	Hedges' correction	9.18329	-1.05797	-1.61221	-0.49514
	Glass's delta	11.0757	-0.877202	-1.45564	-0.283216
Creat	Cohen's d	0.926056	-0.406068	-0.938967	0.130508
	Hedges' correction	0.939171	-0.400398	-0.925855	0.128685
	Glass's delta	0.991696	-0.379191	-0.915607	0.165098
Volume	Cohen's d	262.046	0.427314	-0.131224	0.981681
	Hedges' correction	266.06	0.420867	-0.129244	0.96687
	Glass's delta	243.973	0.458967	-0.113328	1.02103
a. The denominator used in estimating the effect sizes. Cohen's d uses the pooled standard deviation. Hedges' correction uses the pooled standard deviation, plus a correction factor. Glass's delta uses the sample standard deviation of the control group.
Group Statistics
Procedure		N	Mean	Std. Deviation	Std. Error Mean
Apache	1.00	32	7.46875	3.61881	0.639721
	2.00	24	9.66667	4.20834	0.859024
Independent Samples Test
		Levene's Test for Equality of Variances		t-test for Equality of Means
		F	Sig.	t	df	Significance		Mean Difference	Std. Error Difference	95% Confidence Interval of the Difference
						One-Sided p	Two-Sided p			Lower	Upper
Apache	Equal variances assumed	0.563445	0.456134	-2.09734	54	0.0203301	0.0406601	-2.19792	1.04795	-4.29894	-0.0968942
	Equal variances not assumed			-2.0521	45.2575	0.0229856	0.0459712	-2.19792	1.07106	-4.3548	-0.0410337
Independent Samples Effect Sizes
		Standardizera	Point Estimate	95% Confidence Interval
				Lower	Upper
Apache	Cohen's d	3.88087	-0.566346	-1.1037	-0.0239564
	Hedges' correction	3.93583	-0.558438	-1.08829	-0.0236218
	Glass's delta	4.20834	-0.522276	-1.06716	0.0330797
a. The denominator used in estimating the effect sizes. Cohen's d uses the pooled standard deviation. Hedges' correction uses the pooled standard deviation, plus a correction factor. Glass's delta uses the sample standard deviation of the control group.
Statistics
Duration
N	Valid	69
	Missing	0
Mean		8.14493
Median		5
Mode		3
Std. Deviation		16.1976
Minimum		0
Maximum		123
Percentiles	25	3
	50	5
	75	8
Statistics
Age
N	Valid	69
	Missing	0
Mean		44.9565
Median		46
Mode		55
Std. Deviation		16.5888
Minimum		13
Maximum		76
Percentiles	25	33
	50	46
	75	55.5
Age_Recode
		Frequency	Percent	Valid Percent	Cumulative Percent
Valid	0-15	4	5.7971	5.7971	5.7971
	16-30	11	15.942	15.942	21.7391
	31-45	19	27.5362	27.5362	49.2754
	46-60	22	31.8841	31.8841	81.1594
	>61	13	18.8406	18.8406	100
	Total	69	100	100
Group Statistics
Procedure		N	Mean	Std. Deviation	Std. Error Mean
Duration	1.00	32	8.75	21.2056	3.74866
	2.00	24	6	4.53968	0.926658
Independent Samples Test
		Levene's Test for Equality of Variances		t-test for Equality of Means
		F	Sig.	t	df	Significance		Mean Difference	Std. Error Difference	95% Confidence Interval of the Difference
						One-Sided p	Two-Sided p			Lower	Upper
Duration	Equal variances assumed	1.91098	0.172546	0.623338	54	0.267843	0.535686	2.75	4.41173	-6.09498	11.595
	Equal variances not assumed			0.71216	34.7296	0.240561	0.481123	2.75	3.86149	-5.09143	10.5914
Independent Samples Effect Sizes
		Standardizera	Point Estimate	95% Confidence Interval
				Lower	Upper
Duration	Cohen's d	16.3379	0.168321	-0.362652	0.697743
	Hedges' correction	16.5692	0.16597	-0.357587	0.688
	Glass's delta	4.53968	0.60577	0.0427004	1.15699
a. The denominator used in estimating the effect sizes. Cohen's d uses the pooled standard deviation. Hedges' correction uses the pooled standard deviation, plus a correction factor. Glass's delta uses the sample standard deviation of the control group.
Hypothesis Test Summary
	Null Hypothesis	Test	Sig.a,b	Decision
1	The distribution of Duration is the same across categories of Procedure.	Independent-Samples Mann-Whitney U Test	0.372141	Retain the null hypothesis.
2	The distribution of Age is the same across categories of Procedure.	Independent-Samples Mann-Whitney U Test	0.914206	Retain the null hypothesis.
3	The distribution of Hb is the same across categories of Procedure.	Independent-Samples Mann-Whitney U Test	0.0515462	Retain the null hypothesis.
4	The distribution of Platelet is the same across categories of Procedure.	Independent-Samples Mann-Whitney U Test	0.892294	Retain the null hypothesis.
5	The distribution of PT/InR is the same across categories of Procedure.	Independent-Samples Mann-Whitney U Test	0.505081	Retain the null hypothesis.
6	The distribution of Bil is the same across categories of Procedure.	Independent-Samples Mann-Whitney U Test	0.44637	Retain the null hypothesis.
7	The distribution of ALP is the same across categories of Procedure.	Independent-Samples Mann-Whitney U Test	0.868003	Retain the null hypothesis.
8	The distribution of Albumin is the same across categories of Procedure.	Independent-Samples Mann-Whitney U Test	.750c	Retain the null hypothesis.
9	The distribution of Respi Rate is the same across categories of Procedure.	Independent-Samples Mann-Whitney U Test	0.00225679	Reject the null hypothesis.
10	The distribution of Pulse is the same across categories of Procedure.	Independent-Samples Mann-Whitney U Test	0.660651	Retain the null hypothesis.
11	The distribution of map is the same across categories of Procedure.	Independent-Samples Mann-Whitney U Test	0.512947	Retain the null hypothesis.
12	The distribution of A-a gradient/PaO2 is the same across categories of Procedure.	Independent-Samples Mann-Whitney U Test	0.000493999	Reject the null hypothesis.
13	The distribution of pH/HCO3 is the same across categories of Procedure.	Independent-Samples Mann-Whitney U Test	0.00168695	Reject the null hypothesis.
14	The distribution of Na+ is the same across categories of Procedure.	Independent-Samples Mann-Whitney U Test	0.572776	Retain the null hypothesis.
15	The distribution of K+ is the same across categories of Procedure.	Independent-Samples Mann-Whitney U Test	0.269872	Retain the null hypothesis.
16	The distribution of Hb/HCT is the same across categories of Procedure.	Independent-Samples Mann-Whitney U Test	0.10982	Retain the null hypothesis.
17	The distribution of TLC is the same across categories of Procedure.	Independent-Samples Mann-Whitney U Test	0.000848032	Reject the null hypothesis.
18	The distribution of Creat is the same across categories of Procedure.	Independent-Samples Mann-Whitney U Test	0.0427455	Reject the null hypothesis.
19	The distribution of GCS is the same across categories of Procedure.	Independent-Samples Mann-Whitney U Test	1	Retain the null hypothesis.
20	The distribution of Volume is the same across categories of Procedure.	Independent-Samples Mann-Whitney U Test	0.11467	Retain the null hypothesis.
21	The distribution of Pus in ML is the same across categories of Procedure.	Independent-Samples Mann-Whitney U Test	.d	Unable to compute.
a. The significance level is .050.
b. Asymptotic significance is displayed.
c. Exact significance is displayed for this test.
d. At least one of the specified groups is empty.
Independent-Samples Mann-Whitney U Test
Duration across Procedure
Independent-Samples Mann-Whitney U Test Summary
Total N	56
Mann-Whitney U	437.5
Wilcoxon W	737.5
Test Statistic	437.5
Standard Error	59.9459
Standardized Test Statistic	0.892471
Asymptotic Sig.(2-sided test)	0.372141
Age across Procedure
Independent-Samples Mann-Whitney U Test Summary
Total N	56
Mann-Whitney U	390.5
Wilcoxon W	690.5
Test Statistic	390.5
Standard Error	60.3336
Standardized Test Statistic	0.107734
Asymptotic Sig.(2-sided test)	0.914206
Hb across Procedure
Independent-Samples Mann-Whitney U Test Summary
Total N	56
Mann-Whitney U	501.5
Wilcoxon W	801.5
Test Statistic	501.5
Standard Error	60.3522
Standardized Test Statistic	1.9469
Asymptotic Sig.(2-sided test)	0.0515462
Platelet across Procedure
Independent-Samples Mann-Whitney U Test Summary
Total N	53
Mann-Whitney U	348.5
Wilcoxon W	601.5
Test Statistic	348.5
Standard Error	55.3907
Standardized Test Statistic	0.135402
Asymptotic Sig.(2-sided test)	0.892294
PT/InR across Procedure
Independent-Samples Mann-Whitney U Test Summary
Total N	42
Mann-Whitney U	238.5
Wilcoxon W	391.5
Test Statistic	238.5
Standard Error	39.0088
Standardized Test Statistic	0.666517
Asymptotic Sig.(2-sided test)	0.505081
Bil across Procedure
Independent-Samples Mann-Whitney U Test Summary
Total N	55
Mann-Whitney U	323.5
Wilcoxon W	599.5
Test Statistic	323.5
Standard Error	58.4388
Standardized Test Statistic	-0.761481
Asymptotic Sig.(2-sided test)	0.44637
ALP across Procedure
Independent-Samples Mann-Whitney U Test Summary
Total N	54
Mann-Whitney U	347
Wilcoxon W	623
Test Statistic	347
Standard Error	57.1613
Standardized Test Statistic	-0.166196
Asymptotic Sig.(2-sided test)	0.868003
Albumin across Procedure
Independent-Samples Mann-Whitney U Test Summary
Total N	18
Mann-Whitney U	32.5
Wilcoxon W	53.5
Test Statistic	32.5
Standard Error	10.6495
Standardized Test Statistic	-0.328654
Asymptotic Sig.(2-sided test)	0.742417
Exact Sig.(2-sided test)	0.750269
Respi Rate across Procedure
Independent-Samples Mann-Whitney U Test Summary
Total N	56
Mann-Whitney U	563
Wilcoxon W	863
Test Statistic	563
Standard Error	58.6083
Standardized Test Statistic	3.05418
Asymptotic Sig.(2-sided test)	0.00225679
Pulse across Procedure
Independent-Samples Mann-Whitney U Test Summary
Total N	56
Mann-Whitney U	410.5
Wilcoxon W	710.5
Test Statistic	410.5
Standard Error	60.3625
Standardized Test Statistic	0.439014
Asymptotic Sig.(2-sided test)	0.660651
map across Procedure
Independent-Samples Mann-Whitney U Test Summary
Total N	56
Mann-Whitney U	344.5
Wilcoxon W	644.5
Test Statistic	344.5
Standard Error	60.3739
Standardized Test Statistic	-0.654256
Asymptotic Sig.(2-sided test)	0.512947
A-a gradient/PaO2 across Procedure
Independent-Samples Mann-Whitney U Test Summary
Total N	56
Mann-Whitney U	174
Wilcoxon W	474
Test Statistic	174
Standard Error	60.2757
Standardized Test Statistic	-3.48399
Asymptotic Sig.(2-sided test)	0.000493999
pH/HCO3 across Procedure
Independent-Samples Mann-Whitney U Test Summary
Total N	56
Mann-Whitney U	194.5
Wilcoxon W	494.5
Test Statistic	194.5
Standard Error	60.3419
Standardized Test Statistic	-3.14044
Asymptotic Sig.(2-sided test)	0.00168695
Na+ across Procedure
Independent-Samples Mann-Whitney U Test Summary
Total N	56
Mann-Whitney U	418
Wilcoxon W	718
Test Statistic	418
Standard Error	60.2871
Standardized Test Statistic	0.563968
Asymptotic Sig.(2-sided test)	0.572776
K+ across Procedure
Independent-Samples Mann-Whitney U Test Summary
Total N	56
Mann-Whitney U	317.5
Wilcoxon W	617.5
Test Statistic	317.5
Standard Error	60.2706
Standardized Test Statistic	-1.10336
Asymptotic Sig.(2-sided test)	0.269872
Hb/HCT across Procedure
Independent-Samples Mann-Whitney U Test Summary
Total N	56
Mann-Whitney U	480.5
Wilcoxon W	780.5
Test Statistic	480.5
Standard Error	60.3501
Standardized Test Statistic	1.599
Asymptotic Sig.(2-sided test)	0.10982
TLC across Procedure
Independent-Samples Mann-Whitney U Test Summary
Total N	56
Mann-Whitney U	585.5
Wilcoxon W	885.5
Test Statistic	585.5
Standard Error	60.3904
Standardized Test Statistic	3.33662
Asymptotic Sig.(2-sided test)	0.000848032
Creat across Procedure
Independent-Samples Mann-Whitney U Test Summary
Total N	56
Mann-Whitney U	506
Wilcoxon W	806
Test Statistic	506
Standard Error	60.2116
Standardized Test Statistic	2.02619
Asymptotic Sig.(2-sided test)	0.0427455
GCS across Procedure
Independent-Samples Mann-Whitney U Test Summary
Total N	56
Mann-Whitney U	384
Wilcoxon W	684
Test Statistic	384
Standard Error	0
Standardized Test Statistic	0
Asymptotic Sig.(2-sided test)	1
Volume across Procedure
Independent-Samples Mann-Whitney U Test Summary
Total N	52
Mann-Whitney U	245
Wilcoxon W	498
Test Statistic	245
Standard Error	53.8812
Standardized Test Statistic	-1.57755
Asymptotic Sig.(2-sided test)	0.11467

## Sheet: Sheet3
Group Statistics
Procedure		N	Mean	Std. Deviation	Std. Error Mean
Duration	1.00	32	5.0625	3.87663	0.685297
	2.00	24	6	4.53968	0.926658
Independent Samples Test
		Levene's Test for Equality of Variances		t-test for Equality of Means
		F	Sig.	t	df	Significance		Mean Difference	Std. Error Difference	95% Confidence Interval of the Difference
						One-Sided p	Two-Sided p			Lower	Upper
Duration	Equal variances assumed	0.00656165	0.935738	-0.832185	54	0.204485	0.40897	-0.9375	1.12655	-3.1961	1.3211
	Equal variances not assumed			-0.813427	45.0418	0.210126	0.420252	-0.9375	1.15253	-3.25876	1.38376
Independent Samples Effect Sizes
		Standardizera	Point Estimate	95% Confidence Interval
				Lower	Upper
Duration	Cohen's d	4.17194	-0.224716	-0.754621	0.307253
	Hedges' correction	4.23102	-0.221578	-0.744083	0.302963
	Glass's delta	4.53968	-0.206512	-0.736875	0.32826
a. The denominator used in estimating the effect sizes. Cohen's d uses the pooled standard deviation. Hedges' correction uses the pooled standard deviation, plus a correction factor. Glass's delta uses the sample standard deviation of the control group.
Independent-Samples Mann-Whitney U Test
Duration across Procedure
Independent-Samples Mann-Whitney U Test Summary
Total N	56
Mann-Whitney U	451
Wilcoxon W	751
Test Statistic	451
Standard Error	59.9168
Standardized Test Statistic	1.11822
Asymptotic Sig.(2-sided test)	0.263474
Oneway
ANOVA
Duration
	Sum of Squares	df	Mean Square	F	Sig.
Between Groups	389.781	3	129.927	2.07644	0.111915
Within Groups	4067.18	65	62.5719
Total	4456.96	68
Post Hoc Tests
Multiple Comparisons
Dependent Variable:	Duration
(I) Apache_Categ	(J) Apache_Categ		Mean Difference (I-J)	Std. Error	Sig.	95% Confidence Interval
						Lower Bound	Upper Bound
Tukey HSD	1.00	2.00	-1.4812	2.78616	0.951067	-8.82764	5.86523
		3.00	-5.42857	2.54713	0.154125	-12.1447	1.2876
		4.00	-0.228571	4.12114	0.999938	-11.095	10.6379
	2.00	1.00	1.4812	2.78616	0.951067	-5.86523	8.82764
		3.00	-3.94737	2.30471	0.325487	-10.0243	2.12961
		4.00	1.25263	3.97588	0.98907	-9.23082	11.7361
	3.00	1.00	5.42857	2.54713	0.154125	-1.2876	12.1447
		2.00	3.94737	2.30471	0.325487	-2.12961	10.0243
		4.00	5.2	3.8122	0.526208	-4.85184	15.2518
	4.00	1.00	0.228571	4.12114	0.999938	-10.6379	11.095
		2.00	-1.25263	3.97588	0.98907	-11.7361	9.23082
		3.00	-5.2	3.8122	0.526208	-15.2518	4.85184
LSD	1.00	2.00	-1.4812	2.78616	0.596795	-7.04555	4.08314
		3.00	-5.4286*	2.54713	0.0368551	-10.5155	-0.341601
		4.00	-0.228571	4.12114	0.95594	-8.45906	8.00192
	2.00	1.00	1.4812	2.78616	0.596795	-4.08314	7.04555
		3.00	-3.94737	2.30471	0.0915279	-8.5502	0.655465
		4.00	1.25263	3.97588	0.753727	-6.68776	9.19302
	3.00	1.00	5.4286*	2.54713	0.0368551	0.341601	10.5155
		2.00	3.94737	2.30471	0.0915279	-0.655465	8.5502
		4.00	5.2	3.8122	0.177259	-2.41348	12.8135
	4.00	1.00	0.228571	4.12114	0.95594	-8.00192	8.45906
		2.00	-1.25263	3.97588	0.753727	-9.19302	6.68776
		3.00	-5.2	3.8122	0.177259	-12.8135	2.41348
Bonferroni	1.00	2.00	-1.4812	2.78616	1	-9.06347	6.10106
		3.00	-5.42857	2.54713	0.221131	-12.3603	1.5032
		4.00	-0.228571	4.12114	1	-11.4439	10.9867
	2.00	1.00	1.4812	2.78616	1	-6.10106	9.06347
		3.00	-3.94737	2.30471	0.549167	-10.2194	2.32469
		4.00	1.25263	3.97588	1	-9.56735	12.0726
	3.00	1.00	5.42857	2.54713	0.221131	-1.5032	12.3603
		2.00	3.94737	2.30471	0.549167	-2.32469	10.2194
		4.00	5.2	3.8122	1	-5.17452	15.5745
	4.00	1.00	0.228571	4.12114	1	-10.9867	11.4439
		2.00	-1.25263	3.97588	1	-12.0726	9.56735
		3.00	-5.2	3.8122	1	-15.5745	5.17452
*. The mean difference is significant at the 0.05 level.
Homogeneous Subsets
Duration
Apache_Categ		N	Subset for alpha = 0.05
			1
Tukey HSDa,b	1.00	14	3.57143
	4.00	5	3.8
	2.00	19	5.05263
	3.00	31	9
	Sig.		0.371489
Means for groups in homogeneous subsets are displayed.
a. Uses Harmonic Mean Sample Size = 11.226.
b. The group sizes are unequal. The harmonic mean of the group sizes is used. Type I error levels are not guaranteed.
Crosstabs
Apache_Categ * Death Crosstabulation
			Death		Total
			1	0
Apache_Categ	1.00	Count	0	14	14
		% within Apache_Categ	0	1	1
		% within Death	0	0.259259	0.202899
	2.00	Count	0	19	19
		% within Apache_Categ	0	1	1
		% within Death	0	0.351852	0.275362
	3.00	Count	11	20	31
		% within Apache_Categ	0.354839	0.645161	1
		% within Death	0.733333	0.37037	0.449275
	4.00	Count	4	1	5
		% within Apache_Categ	0.8	0.2	1
		% within Death	0.266667	0.0185185	0.0724638
Total		Count	15	54	69
		% within Apache_Categ	0.217391	0.782609	1
		% within Death	1	1	1
Chi-Square Tests
	Value	df	Asymptotic Significance (2-sided)
Pearson Chi-Square	22.585a	3	4.92913e-05
Likelihood Ratio	26.9267	3	6.09948e-06
N of Valid Cases	69
a. 4 cells (50.0%) have expected count less than 5. The minimum expected count is 1.09.
Calcin Dindo
		Frequency	Percent	Valid Percent	Cumulative Percent
Valid		44	63.7681	63.7681	63.7681
	1	6	8.69565	8.69565	72.4638
	1d	1	1.44928	1.44928	73.913
	2	4	5.7971	5.7971	79.7101
	3b	1	1.44928	1.44928	81.1594
	4a	1	1.44928	1.44928	82.6087
	5	12	17.3913	17.3913	100
	Total	69	100	100
Independent-Samples Kruskal-Wallis Test
Duration across Calcin Dindo
Independent-Samples Kruskal-Wallis Test Summary
Total N	69
Test Statistic	7.796a,b
Degree Of Freedom	6
Asymptotic Sig.(2-sided test)	0.253461
a. The test statistic is adjusted for ties.
b. Multiple comparisons are not performed because the overall test does not show significant differences across samples.
Oneway
ANOVA
Duration
	Sum of Squares	df	Mean Square	F	Sig.
Between Groups	4.84091	2	2.42045	0.171439	0.84374
Within Groups	268.25	19	14.1184
Total	273.091	21
Post Hoc Tests
Multiple Comparisons
Dependent Variable:	Duration
(I) Calcin Dindo	(J) Calcin Dindo		Mean Difference (I-J)	Std. Error	Sig.	95% Confidence Interval
						Lower Bound	Upper Bound
Tukey HSD	1	2	-0.75	2.42542	0.948797	-6.91167	5.41167
		5	0.5	1.87872	0.961785	-4.27281	5.27281
	2	1	0.75	2.42542	0.948797	-5.41167	6.91167
		5	1.25	2.16936	0.834292	-4.26116	6.76116
	5	1	-0.5	1.87872	0.961785	-5.27281	4.27281
		2	-1.25	2.16936	0.834292	-6.76116	4.26116
LSD	1	2	-0.75	2.42542	0.760516	-5.82647	4.32647
		5	0.5	1.87872	0.793	-3.43222	4.43222
	2	1	0.75	2.42542	0.760516	-4.32647	5.82647
		5	1.25	2.16936	0.571239	-3.29053	5.79053
	5	1	-0.5	1.87872	0.793	-4.43222	3.43222
		2	-1.25	2.16936	0.571239	-5.79053	3.29053
Bonferroni	1	2	-0.75	2.42542	1	-7.11699	5.61699
		5	0.5	1.87872	1	-4.43185	5.43185
	2	1	0.75	2.42542	1	-5.61699	7.11699
		5	1.25	2.16936	1	-4.44481	6.94481
	5	1	-0.5	1.87872	1	-5.43185	4.43185
		2	-1.25	2.16936	1	-6.94481	4.44481
Apache_Categ * colon perforation Crosstabulation
			colon perforation		Total
			no	yes
Apache_Categ	1.00	Count	14	0	14
		% within Apache_Categ	1	0	1
		% within colon perforation	0.237288	0	0.202899
	2.00	Count	19	0	19
		% within Apache_Categ	1	0	1
		% within colon perforation	0.322034	0	0.275362
	3.00	Count	23	8	31
		% within Apache_Categ	0.741935	0.258065	1
		% within colon perforation	0.389831	0.8	0.449275
	4.00	Count	3	2	5
		% within Apache_Categ	0.6	0.4	1
		% within colon perforation	0.0508475	0.2	0.0724638
Total		Count	59	10	69
		% within Apache_Categ	0.855072	0.144928	1
		% within colon perforation	1	1	1
Chi-Square Tests
	Value	df	Asymptotic Significance (2-sided)
Pearson Chi-Square	11.420a	3	0.00965742
Likelihood Ratio	14.9721	3	0.00184069
N of Valid Cases	69
a. 5 cells (62.5%) have expected count less than 5. The minimum expected count is .72.
Procedure * Death Crosstabulation
			Death		Total
			1	0
Procedure	1.00	Count	1	31	32
		% within Procedure	0.03125	0.96875	1
		% within Death	0.0833333	0.704545	0.571429
	2.00	Count	11	13	24
		% within Procedure	0.458333	0.541667	1
		% within Death	0.916667	0.295455	0.428571
Total		Count	12	44	56
		% within Procedure	0.214286	0.785714	1
		% within Death	1	1	1
Chi-Square Tests
	Value	df	Asymptotic Significance (2-sided)	Exact Sig. (2-sided)	Exact Sig. (1-sided)
Pearson Chi-Square	14.857a	1	0.000115957
Continuity Correctionb	12.429	1	0.000422723
Likelihood Ratio	16.1888	1	5.73307e-05
Fisher's Exact Test				0.000147893	0.000147893
N of Valid Cases	56
a. 0 cells (0.0%) have expected count less than 5. The minimum expected count is 5.14.
b. Computed only for a 2x2 table
Oneway
ANOVA
Duration
	Sum of Squares	df	Mean Square	F	Sig.
Between Groups	297.146	5	59.4292	4.2044	0.00896033
Within Groups	282.7	20	14.135
Total	579.846	25
Frequencies
CalvinDindo
		Frequency	Percent	Valid Percent	Cumulative Percent
Valid	1	6	8.69565	23.0769	23.0769
	2	1	1.44928	3.84615	26.9231
	3	5	7.24638	19.2308	46.1538
	4	1	1.44928	3.84615	50
	5	1	1.44928	3.84615	53.8462
	6	12	17.3913	46.1538	100
	Total	26	37.6812	100
Missing	System	43	62.3188
Total		69	100
Frequencies
a. CalvinDindo = .
CalvinDindo = 1
Statisticsa
Duration
N	Valid	6
	Missing	0
Mean		5.5
Median		5.5
Mode		5.0b
Std. Deviation		1.64317
Minimum		3
Maximum		8
Percentiles	25	4.5
	50	5.5
	75	6.5
a. CalvinDindo = 1
b. Multiple modes exist. The smallest value is shown
CalvinDindo = 2
Statisticsa
Duration
N	Valid	1
	Missing	0
Mean		11
Median		11
Mode		11
Minimum		11
Maximum		11
Percentiles	25	11
	50	11
	75	11
a. CalvinDindo = 2
CalvinDindo = 3
Statisticsa
Duration
N	Valid	5
	Missing	0
Mean		5.4
Median		6
Mode		6
Std. Deviation		2.19089
Minimum		2
Maximum		8
Percentiles	25	3.5
	50	6
	75	7
a. CalvinDindo = 3
CalvinDindo = 4
Statisticsa
Duration
N	Valid	1
	Missing	0
Mean		22
Median		22
Mode		22
Minimum		22
Maximum		22
Percentiles	25	22
	50	22
	75	22
a. CalvinDindo = 4
CalvinDindo = 5
Statisticsa
Duration
N	Valid	1
	Missing	0
Mean		5
Median		5
Mode		5
Minimum		5
Maximum		5
Percentiles	25	5
	50	5
	75	5
a. CalvinDindo = 5
CalvinDindo = 6
Statisticsa
Duration
N	Valid	12
	Missing	0
Mean		5
Median		3.5
Mode		2
Std. Deviation		4.76731
Minimum		1
Maximum		15
Percentiles	25	2
	50	3.5
	75	6.5
a. CalvinDindo = 6
Procedure = 1.00
Statisticsa
Duration
N	Valid	32
	Missing	0
Mean		5.0625
Median		3.5
Mode		3
Std. Deviation		3.87663
Minimum		0
Maximum		15
Percentiles	25	3
	50	3.5
	75	6
a. Procedure = 1.00
Procedure = 2.00
Statisticsa
Duration
N	Valid	24
	Missing	0
Mean		6
Median		5
Mode		5.0b
Std. Deviation		4.53968
Minimum		1
Maximum		22
Percentiles	25	3.25
	50	5
	75	6.75
a. Procedure = 2.00
b. Multiple modes exist. The smallest value is shown
Procedure * Death Crosstabulation
			Death		Total
			1	0
Procedure	1.00	Count	1	31	32
		% within Procedure	0.03125	0.96875	1
		% within Death	0.0833333	0.704545	0.571429
	2.00	Count	11	13	24
		% within Procedure	0.458333	0.541667	1
		% within Death	0.916667	0.295455	0.428571
Total		Count	12	44	56
		% within Procedure	0.214286	0.785714	1
		% within Death	1	1	1
Chi-Square Tests
	Value	df	Asymptotic Significance (2-sided)	Exact Sig. (2-sided)	Exact Sig. (1-sided)
Pearson Chi-Square	14.857a	1	0.000115957
Continuity Correctionb	12.429	1	0.000422723
Likelihood Ratio	16.1888	1	5.73307e-05
Fisher's Exact Test				0.000147893	0.000147893
N of Valid Cases	56
a. 0 cells (0.0%) have expected count less than 5. The minimum expected count is 5.14.
b. Computed only for a 2x2 table
Risk Estimate
	Value	95% Confidence Interval
		Lower	Upper
Odds Ratio for Procedure (1.00 / 2.00)	0.0381232	0.00445358	0.326339
For cohort Death = 1	0.0681818	0.00943721	0.492599
For cohort Death = 0	1.78846	1.23136	2.59762
N of Valid Cases	56
